# Supplementary material
Source: Research Square preprint supplement (doi:10.21203/rs.3.rs-9362369/v1)

**Supplementary Appendix: Table of Contents**

**Supplementary Table 1……………………………………………………………………………………….……..1**

**Supplementary Figure 1..…………………………………………………………………………………….……..2**

**Supplementary Figure 2..…………………………………………………………………………………….……..2**

**Supplementary Figure 3..…………………………………………………………………………………….……..2**

**Supplementary Figure 4..…………………………………………………………………………………….……..3**

**Supplementary Figure 5..…………………………………………………………………………………….……..3**

**Supplementary Figure 6..…………………………………………………………………………………….……..3**

**Supplementary Figure 7..…………………………………………………………………………………….……..4**

**Supplementary Figure 8..…………………………………………………………………………………….……..4**

**Supplementary Figure 9..…………………………………………………………………………………….……..4**

**Supplementary Figure 10..………………………………………………………………..………………….……..5**

**Supplementary Figure 11..………………………………………………………………..………………….……..5**

**Supplementary Figure 12..………………………………………………………………..………………….……..5**

**Supplementary Figure 13..………………………………………………………………..………………….……..6**

**Supplementary Figure 14..………………………………………………………………..………………….……..6**

**Supplementary Figure 15..………………………………………………………………..………………….……..6**

**Supplementary Figure 16..………………………………………………………………..………………….……..7**

**Supplementary Figure 17..………………………………………………………………..………………….……..7**

**Supplementary Figure 18..………………………………………………………………..………………….……..7**

**Supplementary Figure 19..………………………………………………………………..………………….……..8**

**Supplementary Figure 20..………………………………………………………………..………………….……..8**

**Supplementary Figure 21..………………………………………………………………..………………….……..8**

**Supplementary Figure 22..………………………………………………………………..………………….……..9**

**Supplementary Figure 23..………………………………………………………………..………………….……..9**

**Supplementary Figure 24..………………………………………………………………..………………….……..9**

**Supplementary Figure 25..………………………………………………………………..………………….……..10**

**Supplementary Figure 26..………………………………………………………………..………………….……..10**

**Supplementary Figure 27..………………………………………………………………..………………….……..10**

**Supplementary Figure 28..………………………………………………………………..………………….……..11**

**Supplementary Figure 29..………………………………………………………………..………………….……..11**

**Supplementary Figure 30..………………………………………………………………..………………….……..11**

**Supplementary Figure 31..………………………………………………………………..………………….……..12**

**Supplementary Figure 32..………………………………………………………………..………………….……..12**

**Supplementary Figure 33..………………………………………………………………..………………….……..12**

**Supplementary Figure 34..………………………………………………………………..………………….……..13**

**Supplementary Figure 35..………………………………………………………………..………………….……..13**

**Supplementary Figure 36..………………………………………………………………..………………….……..13**

**Supplementary Figure 37..………………………………………………………………..………………….……..14**

**Supplementary Figure 38..………………………………………………………………..………………….……..15**

**Supplementary Figure 39..………………………………………………………………..………………….……..16**

**Supplementary Figure 40..………………………………………………………………..………………….……..17**

**Supplementary Figure 41..………………………………………………………………..………………….……..18**

**Supplementary Figure 42..………………………………………………………………..………………….……..19**

**Supplementary Figure 43..………………………………………………………………..………………….……..20**

**Supplementary Table 1. Complete search strategy for each database**

| Pubmed (n = 226) |
| --- |
| ( "Traumatic Brain Injury"[Mesh] OR "Brain Injuries, Traumatic"[Mesh] OR tbi[tiab] OR "traumatic brain injur*"[tiab] OR "head injur*"[tiab] OR "craniocerebral injur*"[tiab] OR "intracranial injur*"[tiab] OR "acute subdural hematoma"[tiab] OR "subdural hematoma"[Mesh] OR "subdural hematoma*"[tiab] OR "chronic subdural hematoma*"[tiab] OR "extra-axial hemorrhage"[tiab] OR "acute intracranial hemorrhage"[tiab] ) AND ( surg*[tiab] OR surgery[tiab] OR surgical[tiab] OR neurosurg*[tiab] OR craniotom*[tiab] OR craniectom*[tiab] OR "decompressive craniectomy"[tiab] OR evacuation[tiab] OR "hematoma evacuation"[tiab] ) AND ( "medical management"[tiab] OR "conservative management"[tiab] OR "nonoperative"[tiab] OR "non-operative"[tiab] OR "non-surgical"[tiab] OR "best medical therapy"[tiab] OR "standard medical care"[tiab] OR "medical treatment"[tiab] ) AND ( "Aged"[Mesh] OR "Aged, 80 and over"[Mesh] OR elderly[tiab] OR elder*[tiab] OR geriatric*[tiab] OR older[tiab] OR "older adult*"[tiab]) |
| Embase (n = 394) |
| ('traumatic brain injury'/exp OR 'brain injuries, traumatic'/exp OR tbi:ti,ab OR 'traumatic brain injur*':ti,ab OR 'head injur*':ti,ab OR 'craniocerebral injur*':ti,ab OR 'intracranial injur*':ti,ab OR 'acute subdural hematoma':ti,ab OR 'subdural hematoma'/exp OR 'subdural hematoma*':ti,ab OR 'chronic subdural hematoma*':ti,ab OR 'extra-axial hemorrhage':ti,ab OR 'acute intracranial hemorrhage':ti,ab) AND (surg*:ti,ab OR surgery:ti,ab OR surgical:ti,ab OR neurosurg*:ti,ab OR craniotom*:ti,ab OR craniectom*:ti,ab OR 'decompressive craniectomy':ti,ab OR evacuation:ti,ab OR 'hematoma evacuation':ti,ab) AND ('medical management':ti,ab OR 'conservative management':ti,ab OR nonoperative:ti,ab OR 'non operative':ti,ab OR 'non surgical':ti,ab OR 'best medical therapy':ti,ab OR 'standard medical care':ti,ab OR 'medical treatment':ti,ab) AND ('aged'/exp OR 'aged, 80 and over'/exp OR elderly:ti,ab OR elder*:ti,ab OR geriatric*:ti,ab OR older:ti,ab OR 'older adult*':ti,ab) |
| Web of science (n = 305) |
| (ALL="Traumatic Brain Injury" OR ALL="Brain Injuries, Traumatic" OR (TI=tbi OR AB=tbi) OR (TI="traumatic brain injur*" OR AB="traumatic brain injur*") OR (TI="head injur*" OR AB="head injur*") OR (TI="craniocerebral injur*" OR AB="craniocerebral injur*") OR (TI="intracranial injur*" OR AB="intracranial injur*") OR (TI="acute subdural hematoma" OR AB="acute subdural hematoma") OR ALL="subdural hematoma" OR (TI="subdural hematoma*" OR AB="subdural hematoma*") OR (TI="chronic subdural hematoma*" OR AB="chronic subdural hematoma*") OR (TI="extra-axial hemorrhage" OR AB="extra-axial hemorrhage") OR (TI="acute intracranial hemorrhage" OR AB="acute intracranial hemorrhage")) AND ((TI=surg* OR AB=surg*) OR (TI=surgery OR AB=surgery) OR (TI=surgical OR AB=surgical) OR (TI=neurosurg* OR AB=neurosurg*) OR (TI=craniotom* OR AB=craniotom*) OR (TI=craniectom* OR AB=craniectom*) OR (TI="decompressive craniectomy" OR AB="decompressive craniectomy") OR (TI=evacuation OR AB=evacuation) OR (TI="hematoma evacuation" OR AB="hematoma evacuation")) AND ((TI="medical management" OR AB="medical management") OR (TI="conservative management" OR AB="conservative management") OR (TI=nonoperative OR AB=nonoperative) OR (TI=non-operative OR AB=non-operative) OR (TI=non-surgical OR AB=non-surgical) OR (TI="best medical therapy" OR AB="best medical therapy") OR (TI="standard medical care" OR AB="standard medical care") OR (TI="medical treatment" OR AB="medical treatment")) AND (ALL=Aged OR ALL="Aged, 80 and over" OR (TI=elderly OR AB=elderly) OR (TI=elder* OR AB=elder*) OR (TI=geriatric* OR AB=geriatric*) OR (TI=older OR AB=older) OR (TI="older adult*" OR AB="older adult*")) |

**Supplementary Figure 1. Favorable neurological outcome at discharge**
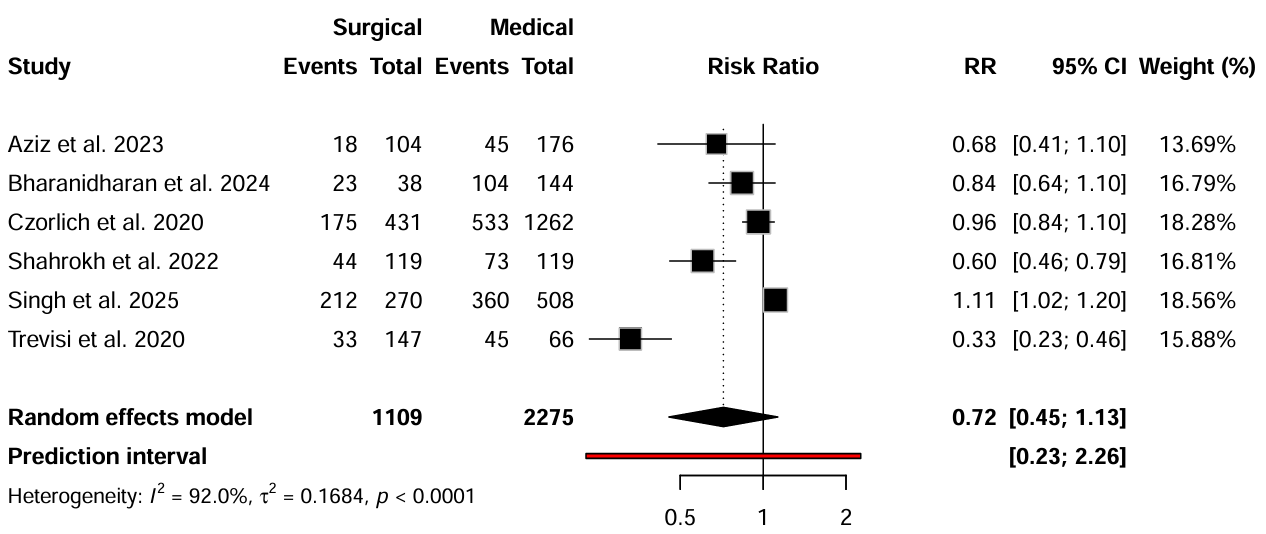


**Supplementary Figure 2. Favorable neurological outcome at discharge in older adults aged 65 and over**
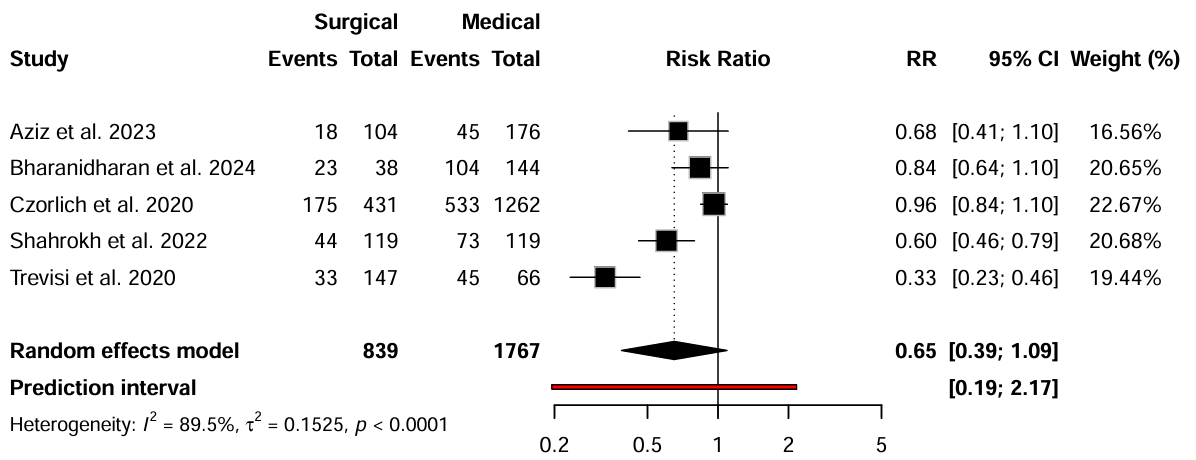


**Supplementary Figure 3. Favorable neurological outcome at discharge in older adults aged 70 and over**
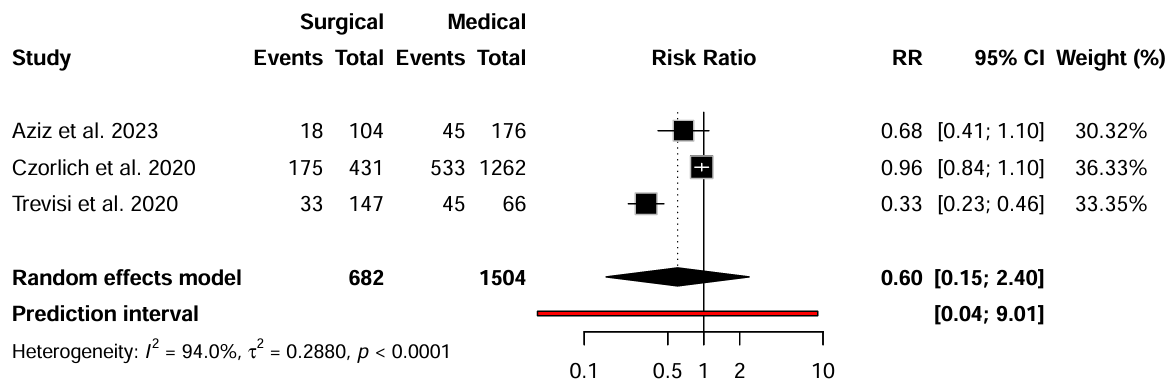


**Supplementary Figure 4. Favorable neurological outcome at discharge in older adults with SDH**
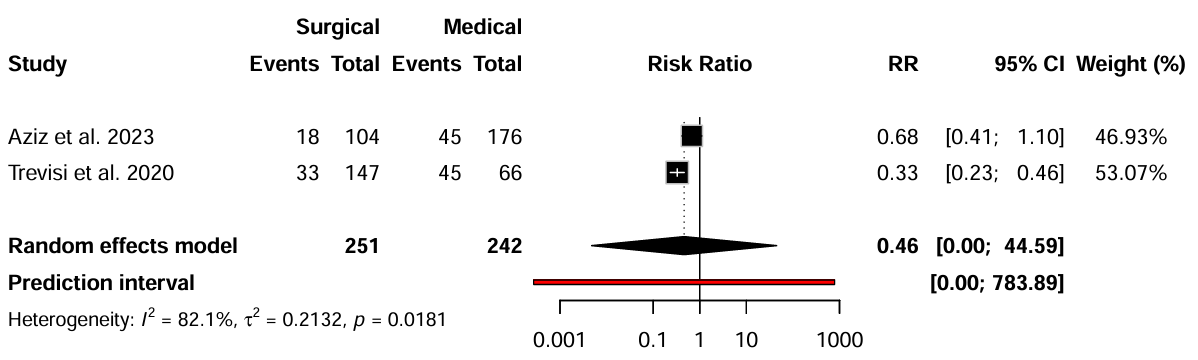


**Supplementary Figure 5. Favorable neurological outcome at discharge in older adults with isolated TBI**


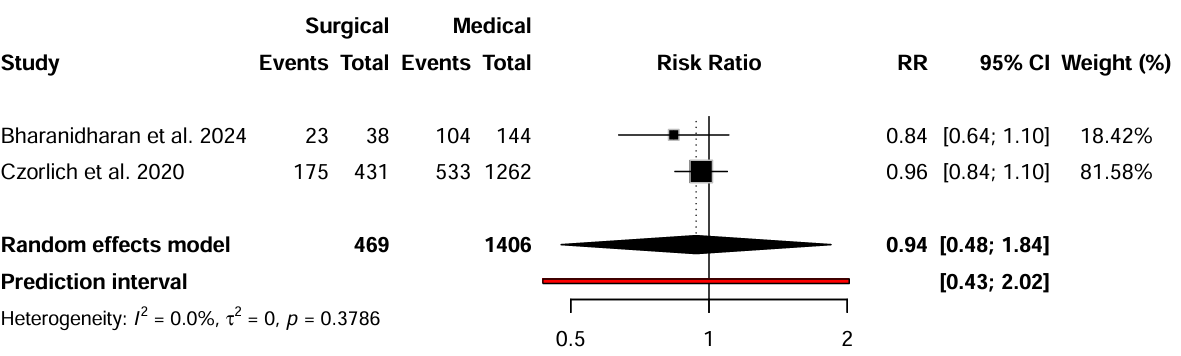


**Supplementary Figure 6. Favorable neurological outcome at 6 months**
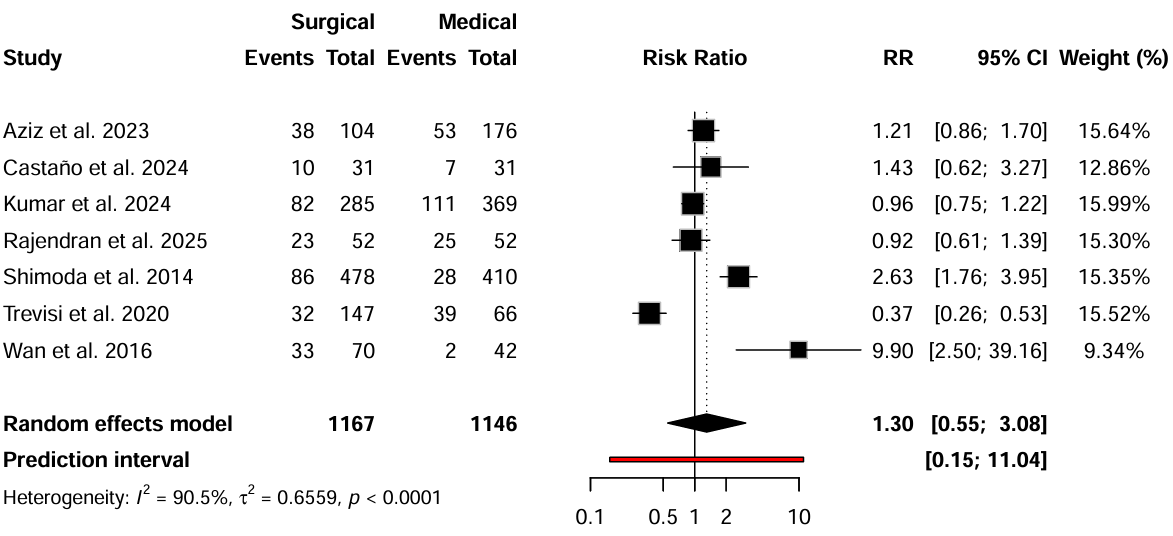


**Supplementary Figure 7. Favorable neurological outcome at 6 months in older adults aged 65 and over**
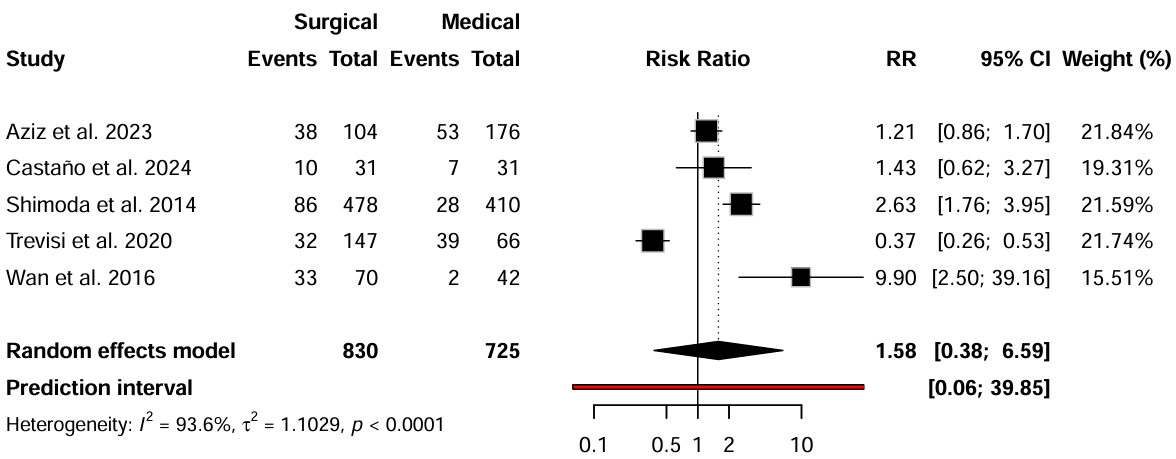


**Supplementary Figure 8. Favorable neurological outcome at 6 months in older adults aged 70 and over**


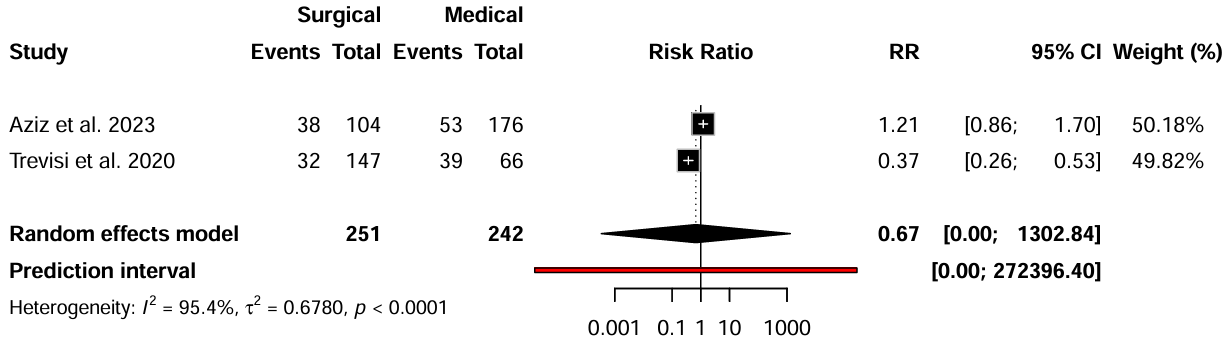


**Supplementary Figure 9. Favorable neurological outcome at 6 months in older adults with SDH**


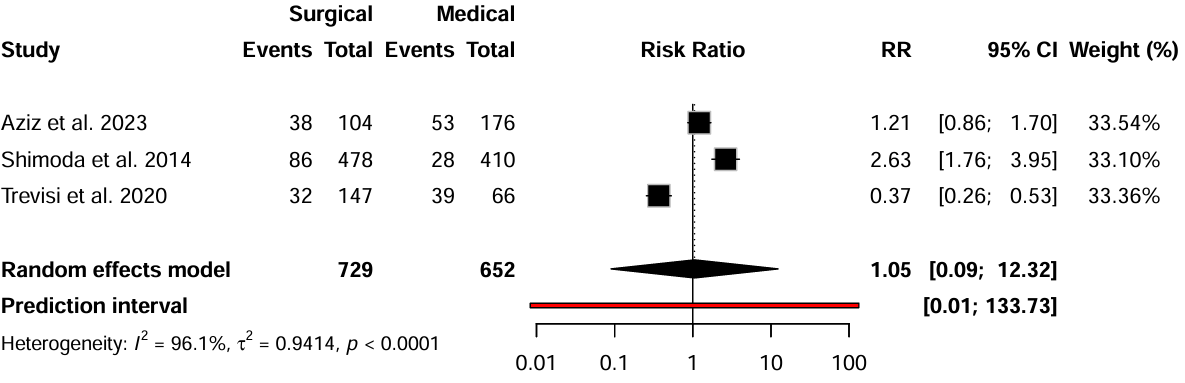


**Supplementary Figure 10. Favorable neurological outcome at 6 months in older adults with isolated TBI**


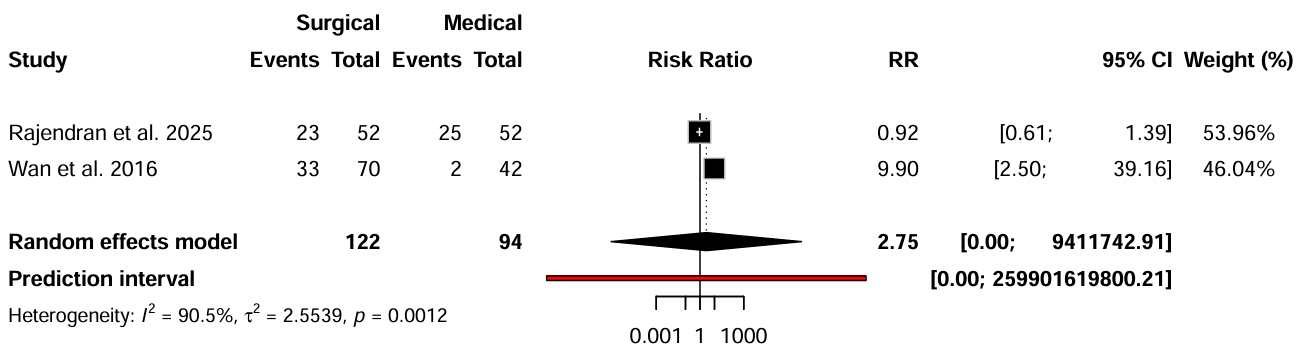


**Supplementary Figure 11. Favorable neurological outcome at 6 months in matched studies**
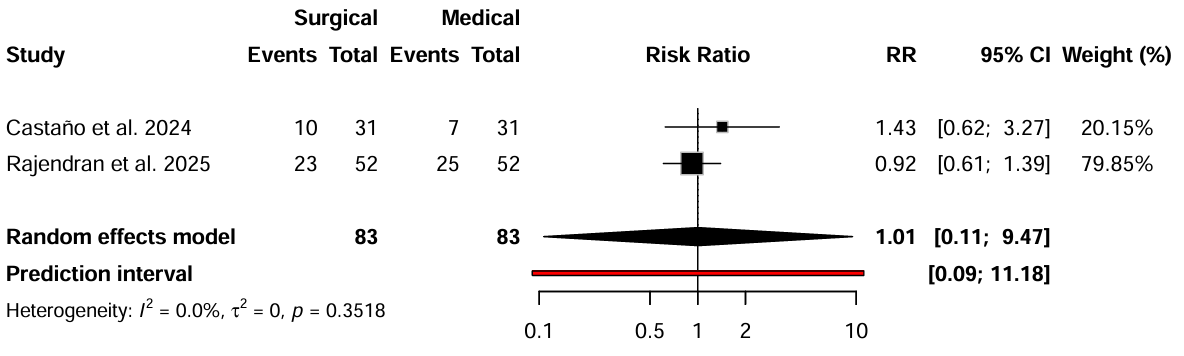


**Supplementary Figure 12. Favorable neurological outcome at 6 months in unmatched studies**
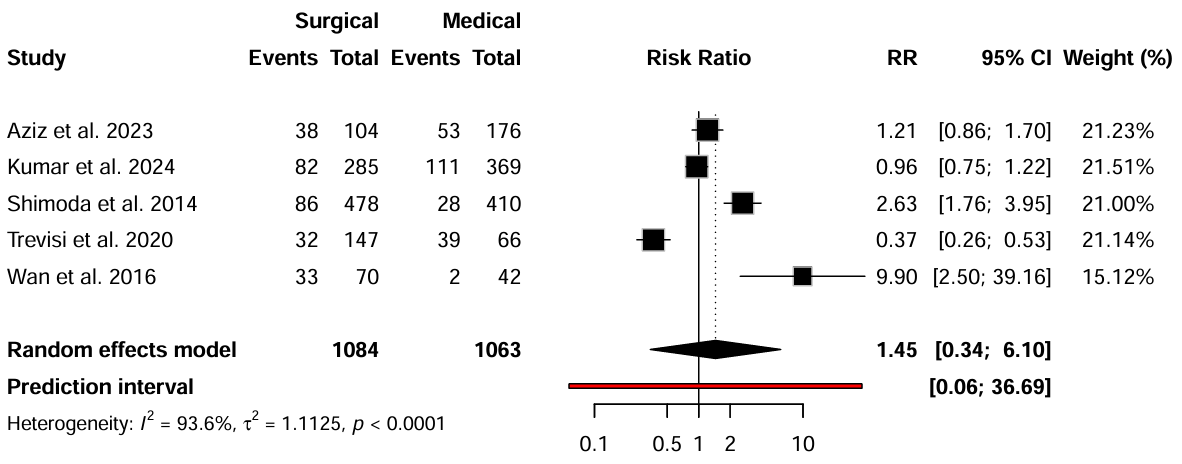


**Supplementary Figure 13. Hospital length of stay**


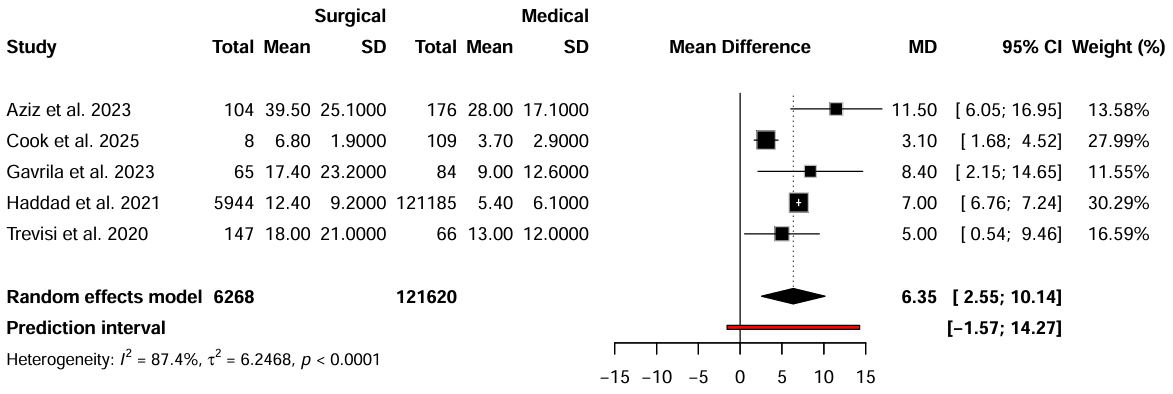


**Supplementary Figure 14. Hospital length of stay in older adults aged 70 and over**


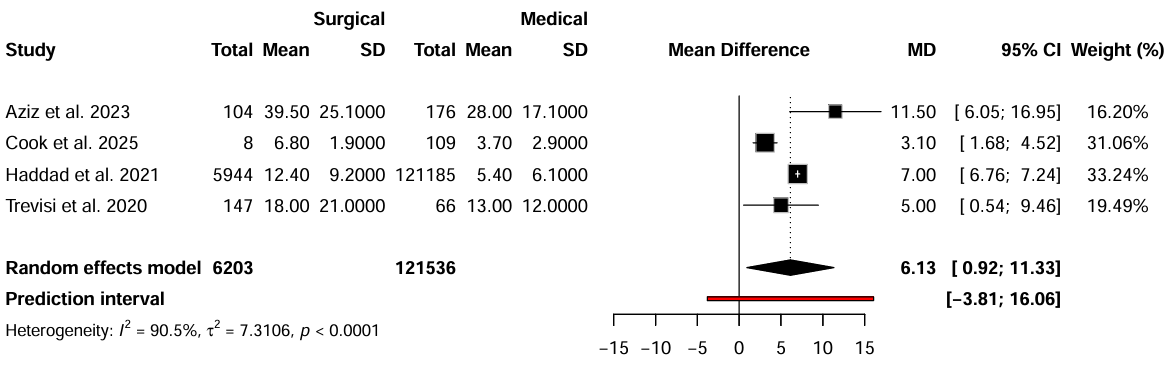


**Supplementary Figure 15. Hospital length of stay in older adults aged 80 and over**

**
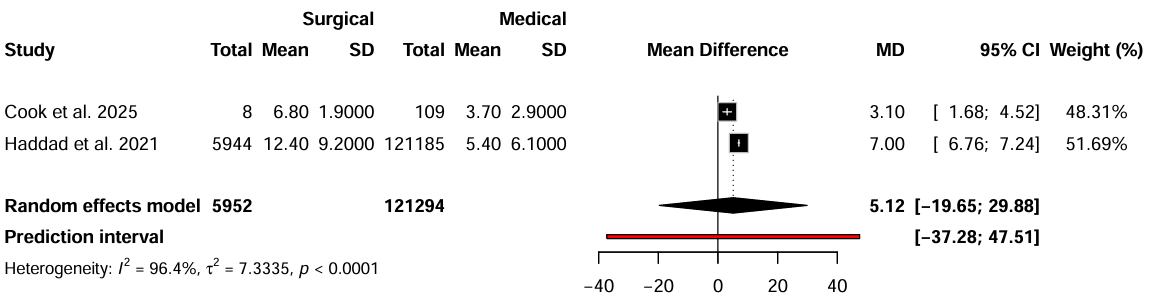
**

**Supplementary Figure 16. Hospital length of stay in older adults with SDH**
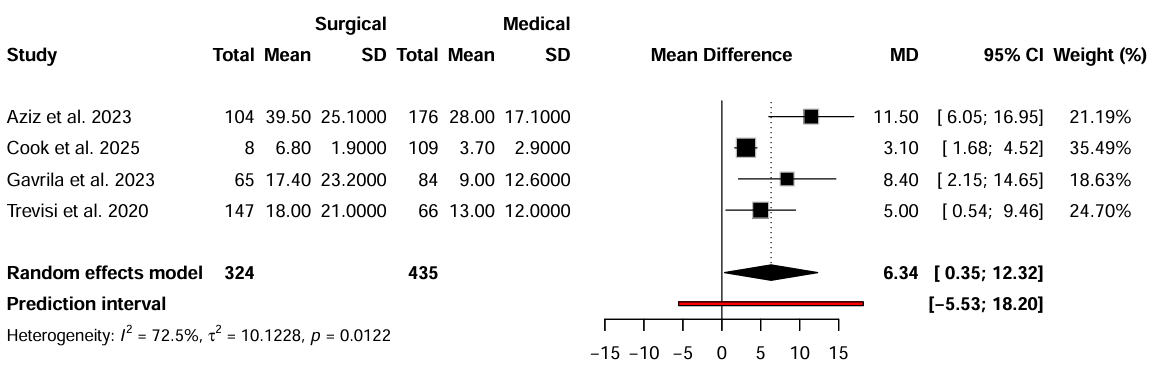


**Supplementary Figure 17. In-hospital mortality**
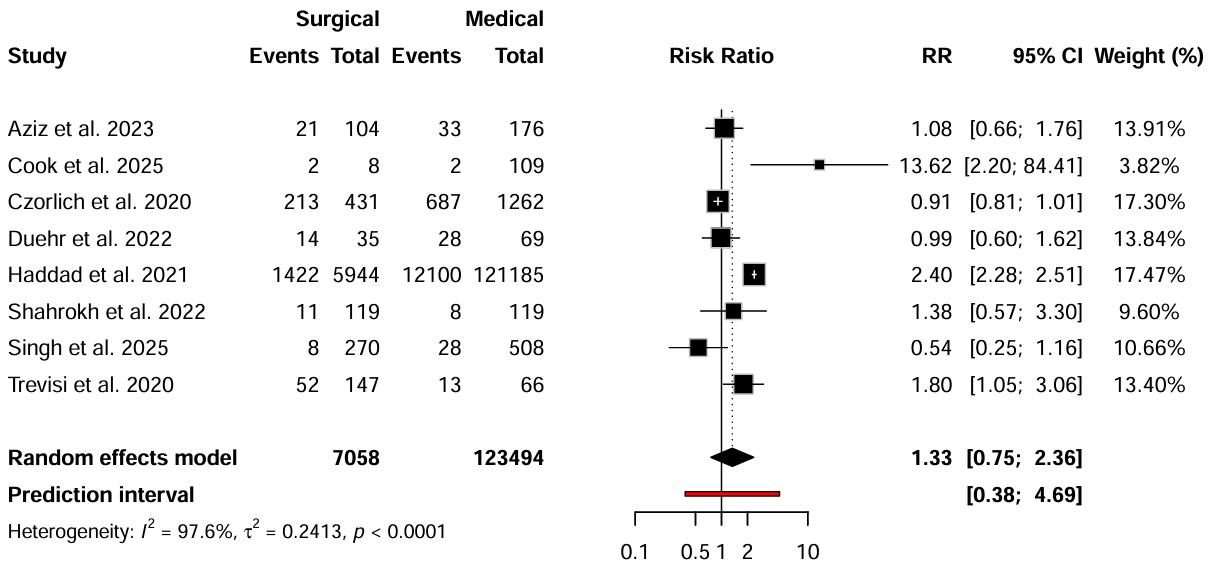


**Supplementary Figure 18. In-hospital mortality in older adults aged 65 and over**


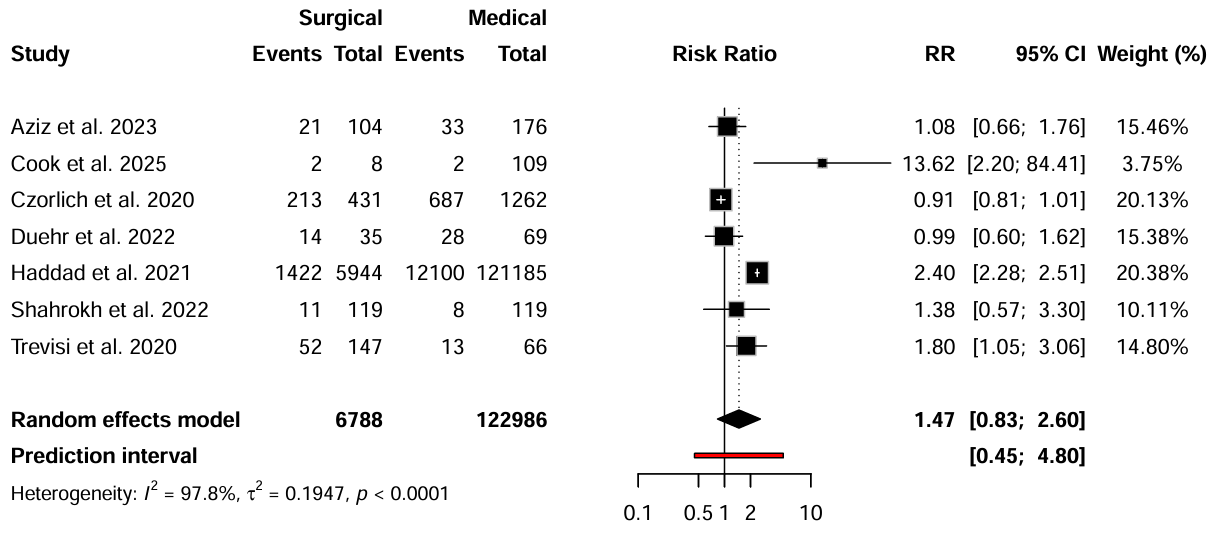


**Supplementary Figure 19. In-hospital mortality in older adults aged 70 and over**
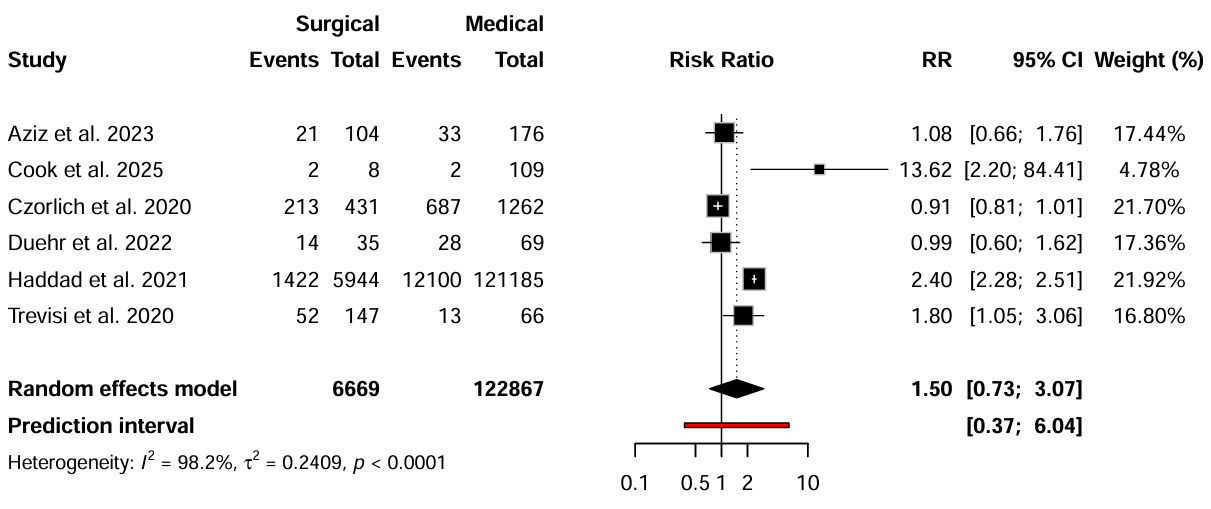


**Supplementary Figure 20. In-hospital mortality in older adults aged 80 and over**
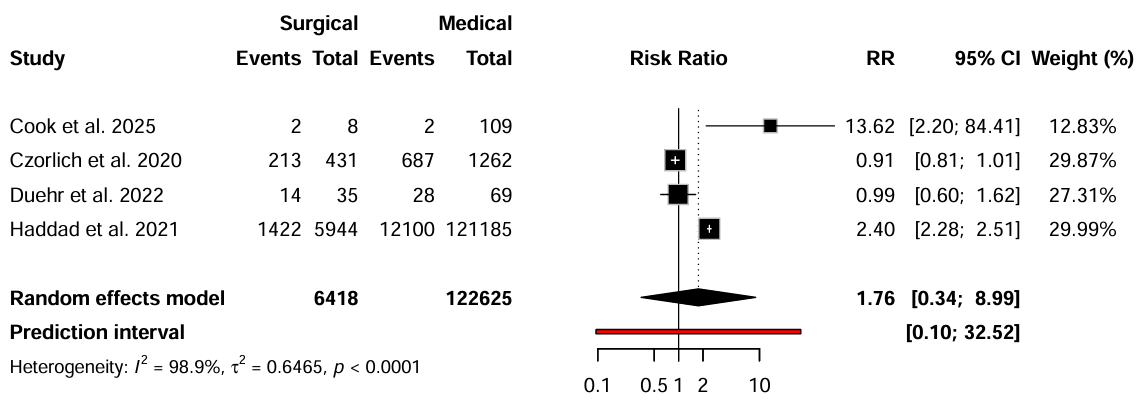


**Supplementary Figure 21. In-hospital mortality in older adults with SDH**
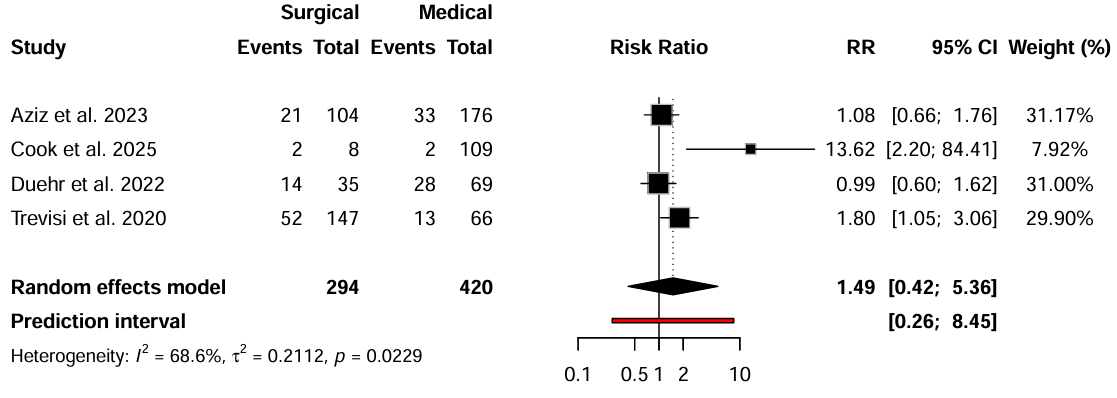


**Supplementary Figure 22. In-hospital mortality in older adults with mild TBI**
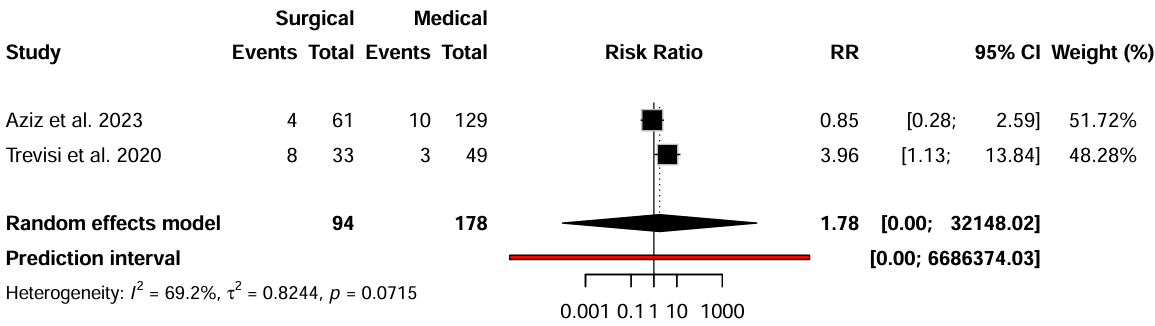


**Supplementary Figure 23. In-hospital mortality in older adults with moderate TBI**


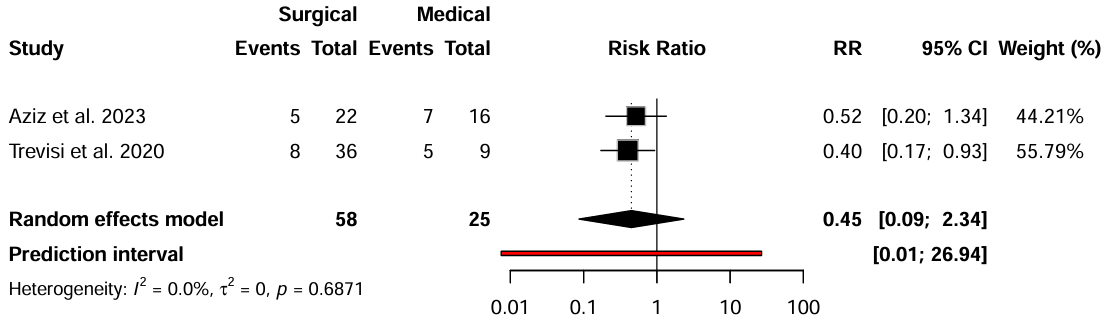


**Supplementary Figure 24. In-hospital mortality in older adults with severe TBI**
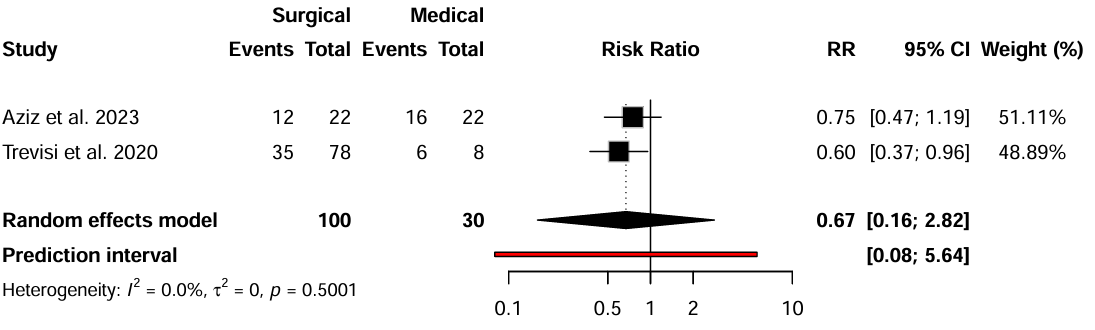


**Supplementary Figure 25. 30-day mortality**
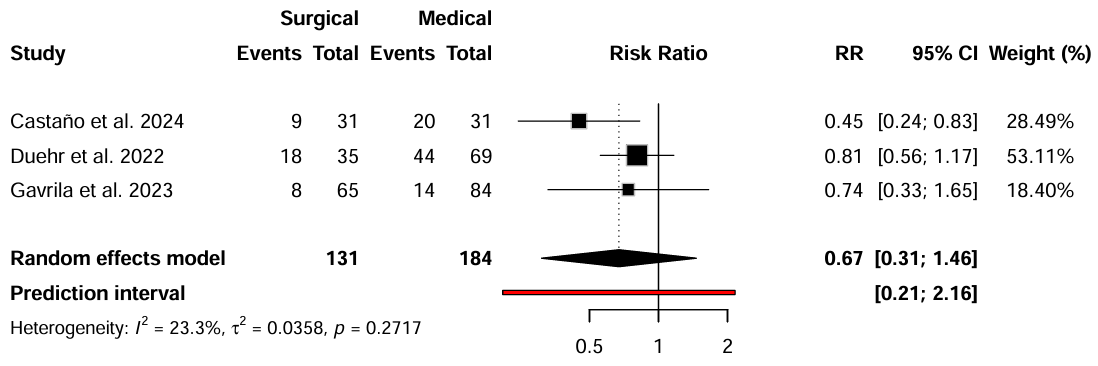


**Supplementary Figure 26. 30-day mortality (unmatched studies)**
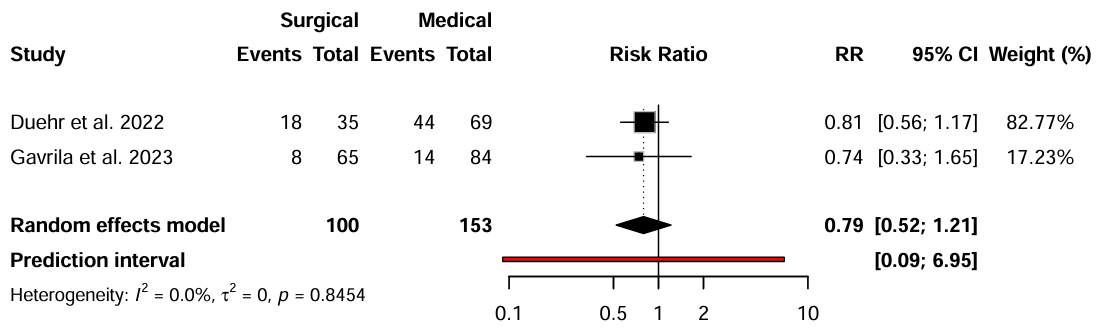


**Supplementary Figure 27. 6-month mortality**
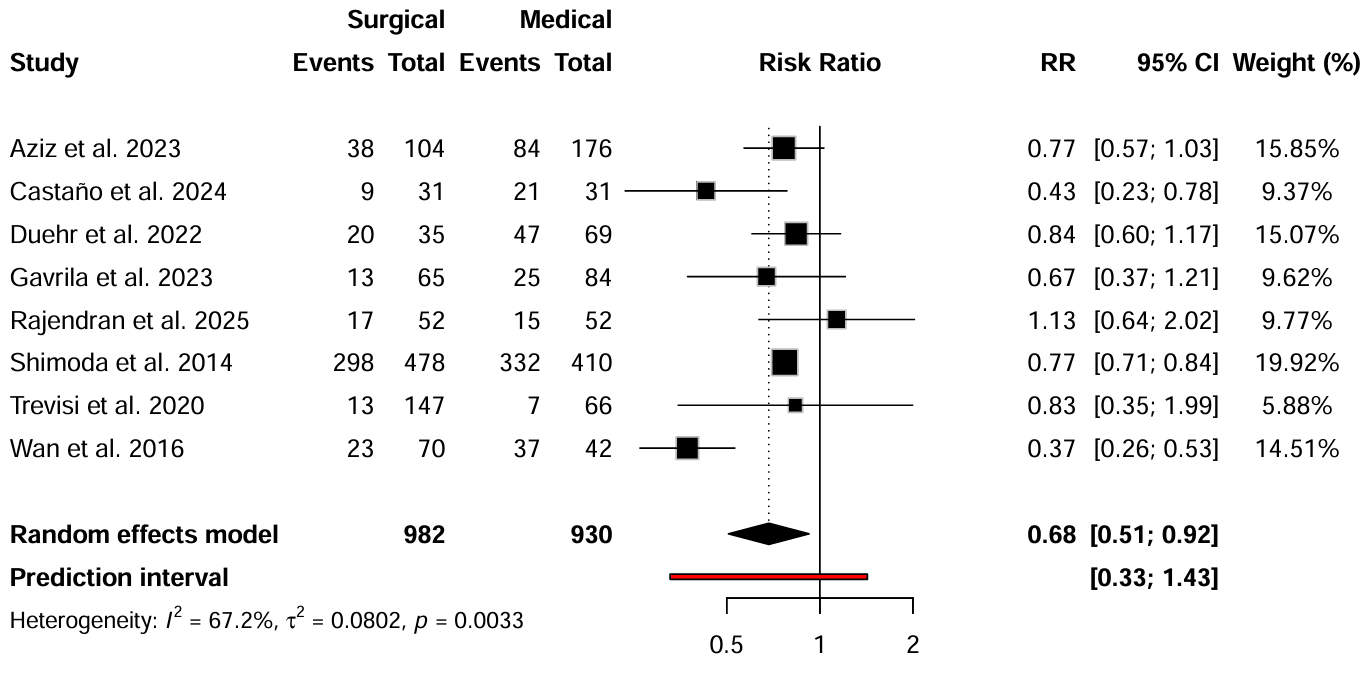


**Supplementary Figure 28. 6-month mortality (matched studies)**
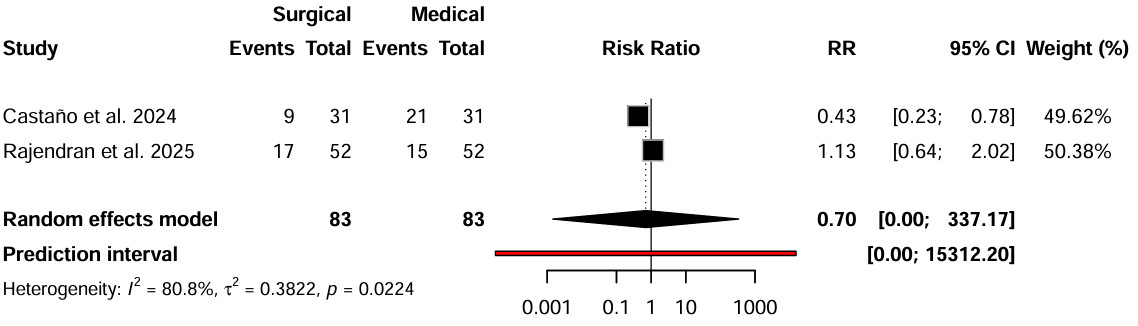


**Supplementary Figure 29. 6-month mortality (unmatched studies)**
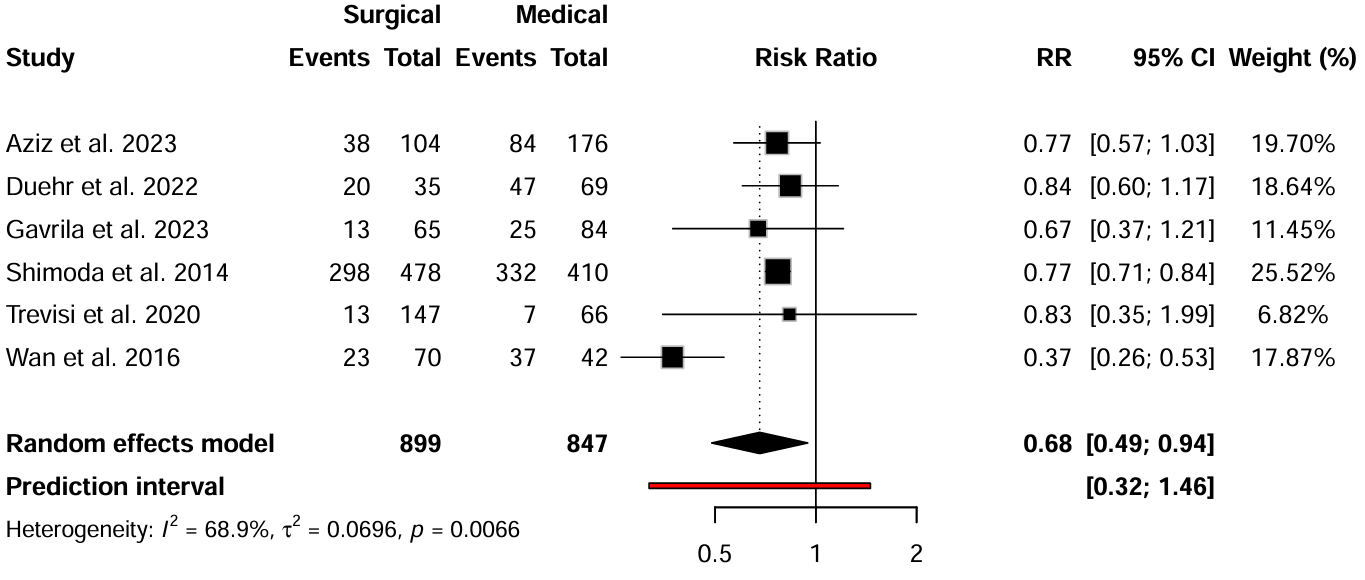


**Supplementary Figure 30. 6-month mortality in older adults aged 65 and over**
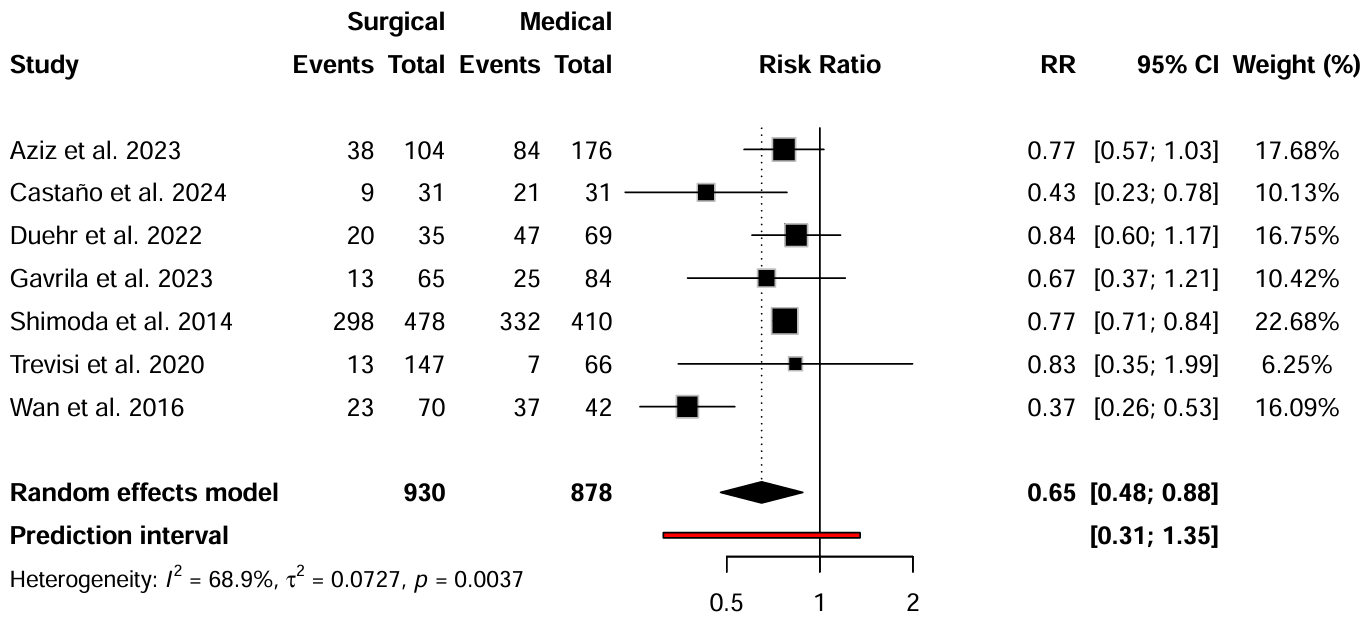


**Supplementary Figure 31. 6-month mortality in older adults aged 70 and over**
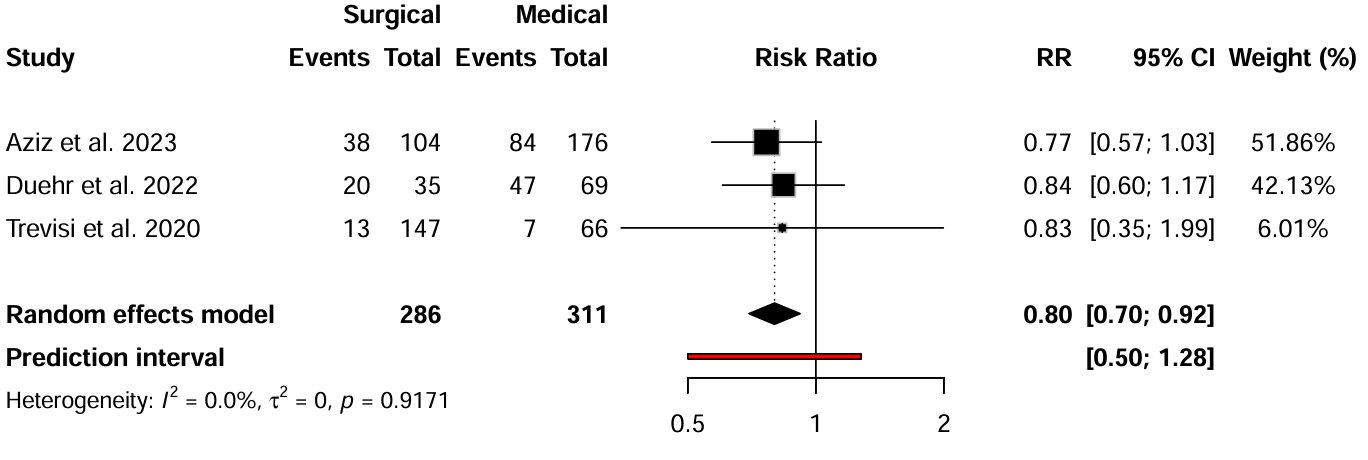


**Supplementary Figure 32. 6-month mortality in older adults with SDH**
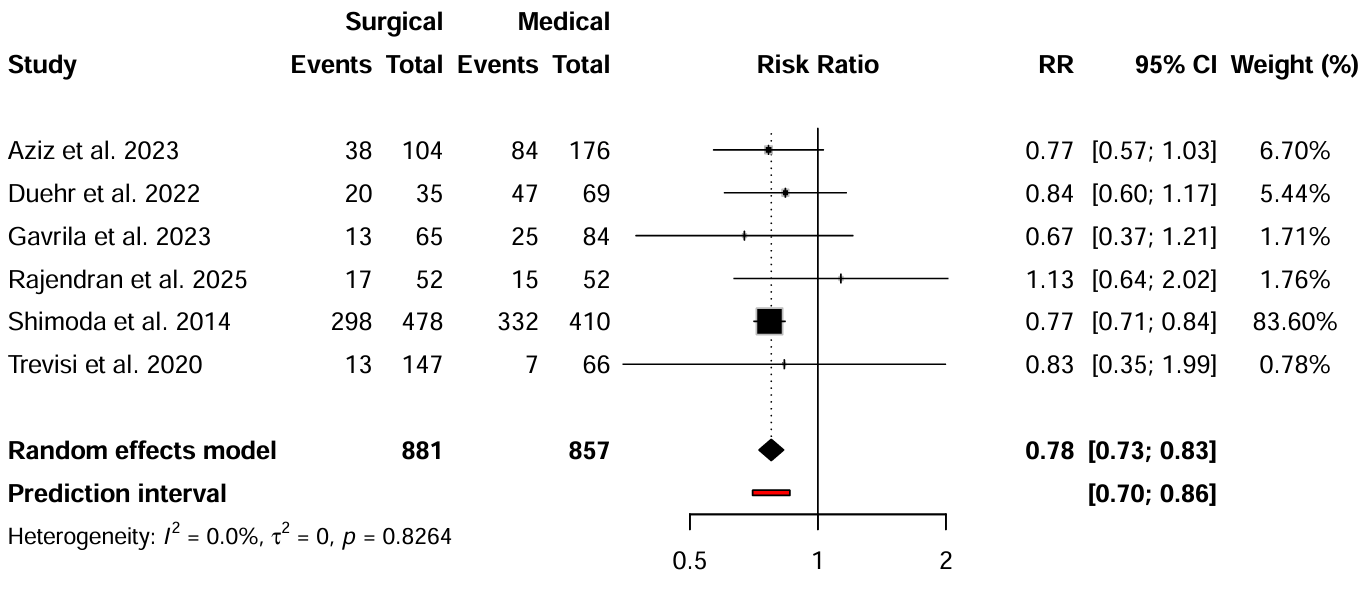


**Supplementary Figure 33. 6-month mortality in older adults with isolated TBI**


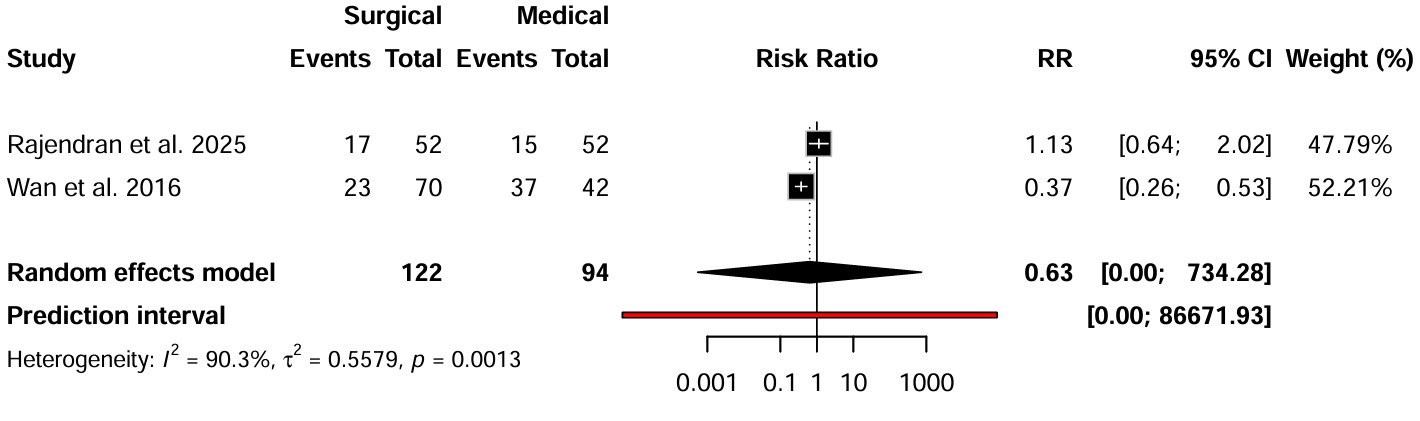


**Supplementary Figure 34. 6-month mortality in older adults with moderate TBI**
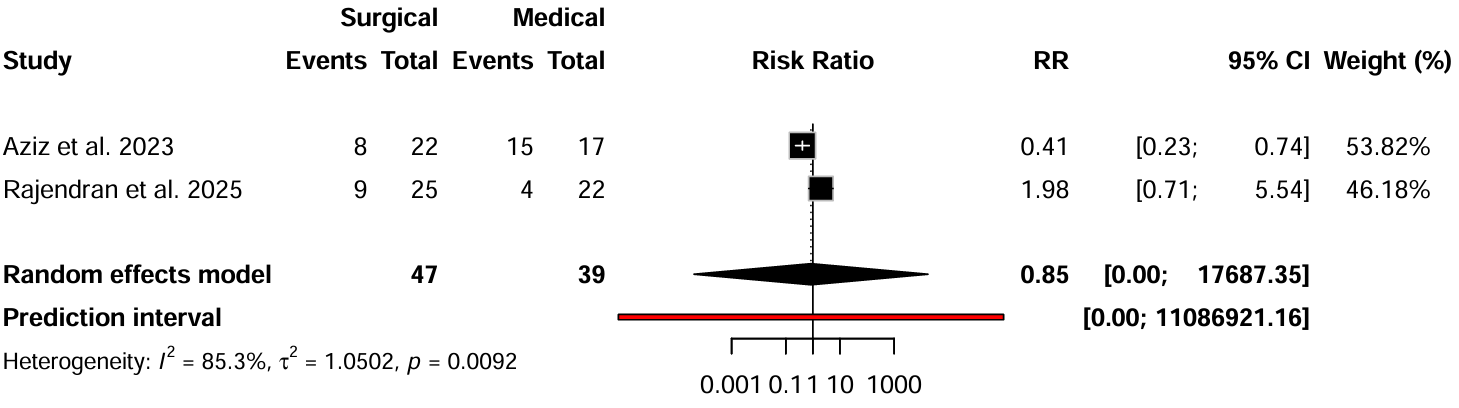


**Supplementary Figure 35. 6-month mortality in older adults with severe TBI**


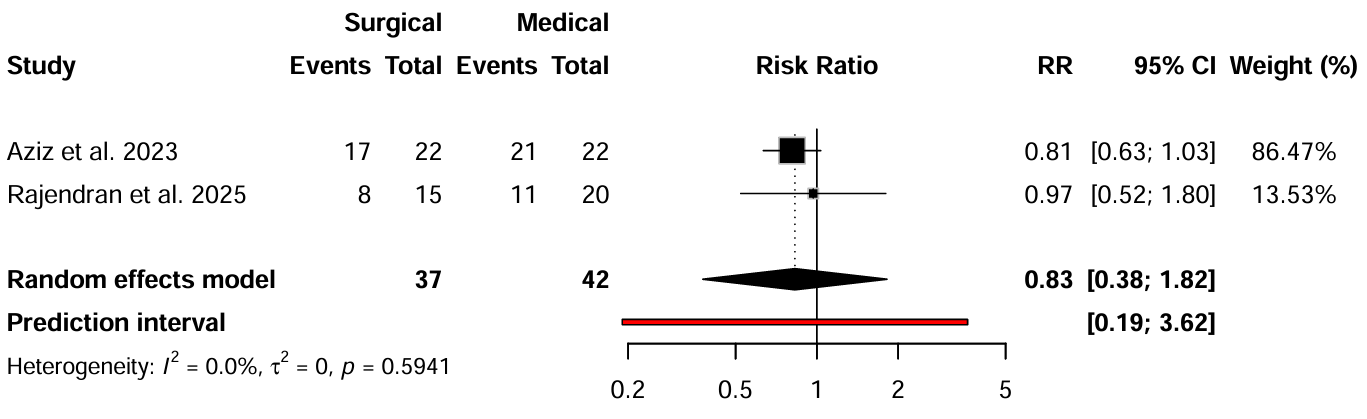


**Supplementary Figure 36. 12-month mortality**
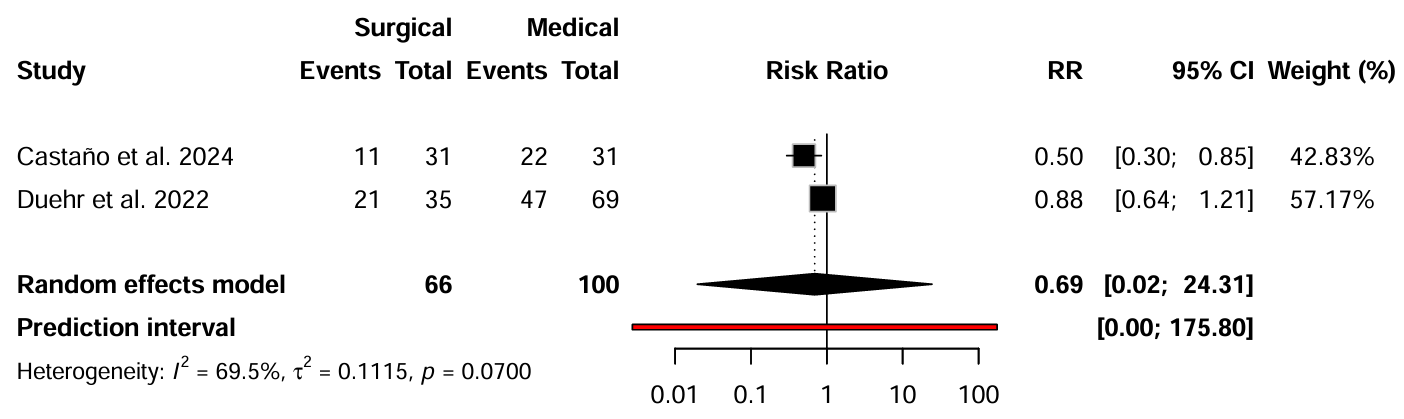


**Supplementary Figure 37. Influence Analysis of favorable neurological outcome at discharge**

**A.**

| Study | rstudent | DFFITS | Cook’s d | cov.r | τ² | Q statistic | Hat | Weight | DFBETAS |
| --- | --- | --- | --- | --- | --- | --- | --- | --- | --- |
| Aziz et al. 2023 | -0.11 | -0.03 | 0.00 | 1.40 | 0.21 | 60.51 | 0.14 | 13.69 | -0.03 |
| Bharanidharan et al. 2024 | 0.37 | 0.18 | 0.04 | 1.47 | 0.21 | 61.49 | 0.17 | 16.79 | 0.18 |
| Czorlich et al. 2020 | 0.74 | 0.36 | 0.14 | 1.37 | 0.19 | 62.58 | 0.18 | 18.28 | 0.36 |
| Shahrokh et al. 2022 | -0.39 | -0.16 | 0.03 | 1.44 | 0.21 | 50.48 | 0.17 | 16.81 | -0.16 |
| Singh et al. 2025 | 1.22 | 0.58 | 0.30 | 1.13 | 0.15 | 37.94 | 0.19 | 18.56 | 0.58 |
| Trevisi et al. 2020 | -3.10 | -1.53 | 0.95 | 0.42 | 0.05 | 23.14 | 0.16 | 15.88 | -1.62 |

**B.**
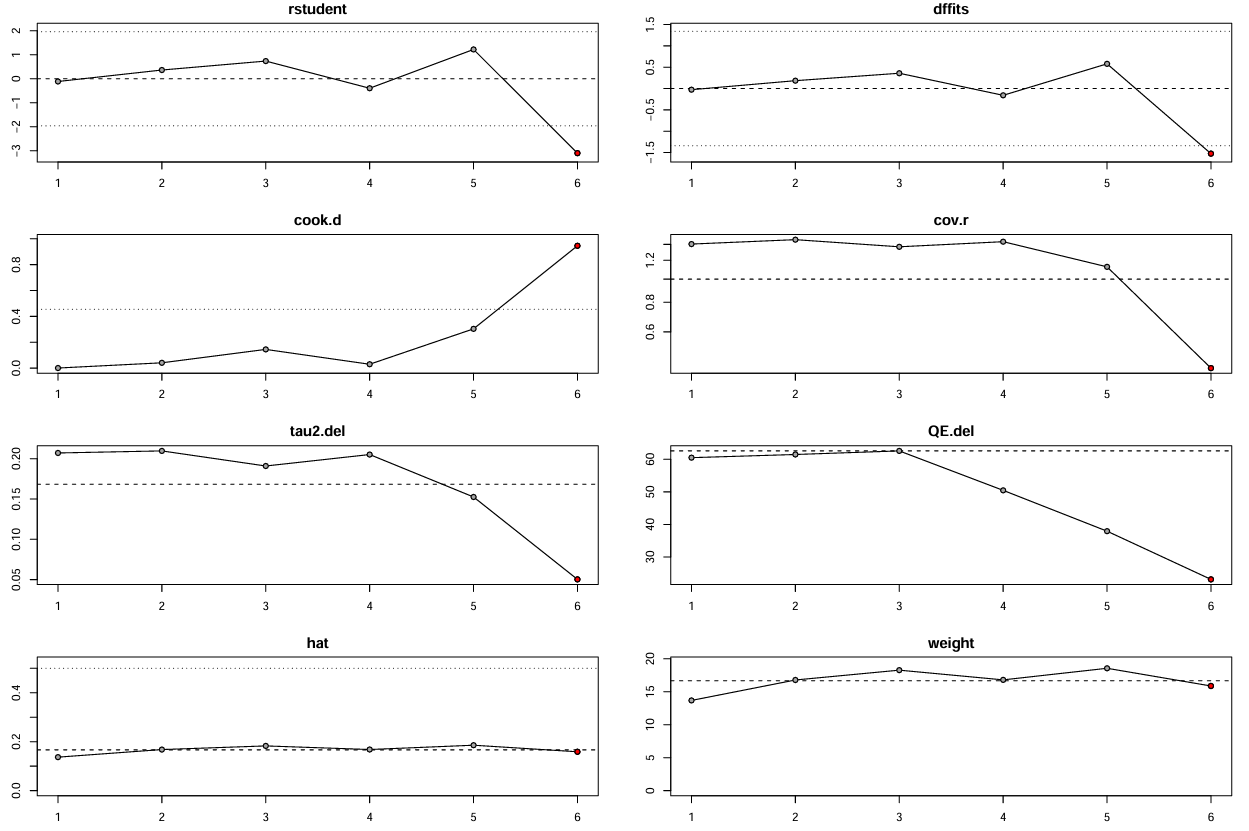


**Supplementary Figure 38. Influence Analysis of favorable neurological outcome at 6 months**

**A.**

| Study | rstudent | DFFITS | Cook’s d | cov.r | τ² | Q statistic | Hat | Weight | DFBETAS |
| --- | --- | --- | --- | --- | --- | --- | --- | --- | --- |
| Aziz et al. 2023 | -0.10 | -0.10 | 0.01 | 1.52 | 0.87 | 62.03 | 0.16 | 15.64 | -0.10 |
| Castaño et al. 2024 | 0.08 | -0.02 | 0.00 | 1.43 | 0.83 | 62.68 | 0.13 | 12.86 | -0.02 |
| Kumar et al. 2024 | -0.38 | -0.21 | 0.06 | 1.50 | 0.85 | 63.01 | 0.16 | 15.99 | -0.22 |
| Rajendran et al. 2025 | -0.42 | -0.23 | 0.06 | 1.47 | 0.84 | 63.13 | 0.15 | 15.30 | -0.23 |
| Shimoda et al. 2014 | 0.93 | 0.40 | 0.16 | 1.16 | 0.64 | 38.88 | 0.15 | 15.35 | 0.40 |
| Trevisi et al. 2020 | -2.21 | -0.75 | 0.29 | 0.64 | 0.32 | 28.61 | 0.16 | 15.52 | -0.73 |
| Wan et al. 2016 | 2.30 | 0.75 | 0.43 | 0.68 | 0.38 | 52.68 | 0.09 | 9.34 | 0.83 |

**B.**
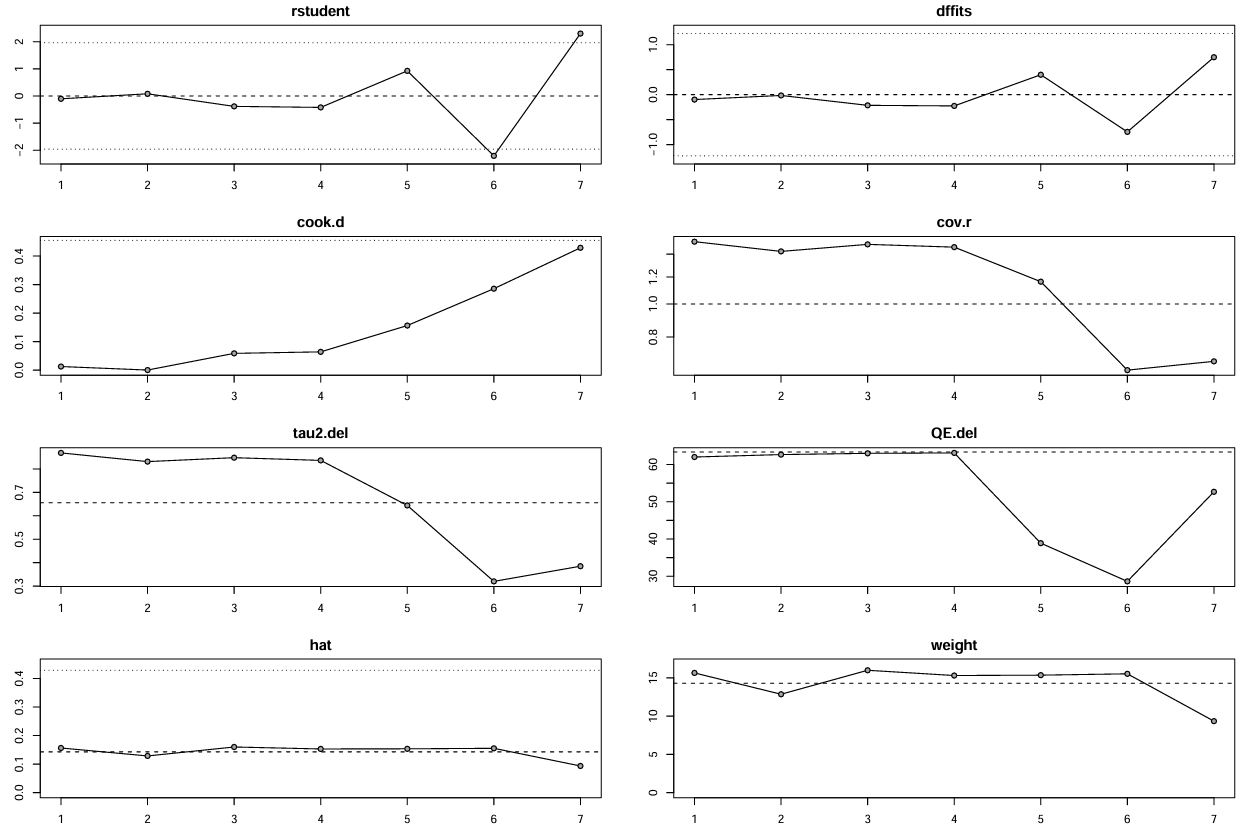


**Supplementary Figure 39. Influence Analysis of hospital length of stay**

**A.**

| Study | rstudent | DFFITS | Cook’s d | cov.r | τ² | Q statistic | Hat | Weight | DFBETAS |
| --- | --- | --- | --- | --- | --- | --- | --- | --- | --- |
| Aziz et al. 2023 | 1.64 | 0.68 | 0.39 | 0.83 | 4.11 | 28.93 | 0.14 | 13.58 | 0.73 |
| Cook et al. 2025 | -5.30 | -1.70 | 0.23 | 0.01 | 0.00 | 3.59 | 0.28 | 27.99 | -5.52 |
| Gavrila et al. 2023 | 0.51 | 0.16 | 0.03 | 1.28 | 7.31 | 31.45 | 0.12 | 11.55 | 0.15 |
| Haddad et al. 2021 | 0.18 | 0.01 | 0.00 | 1.99 | 10.12 | 10.91 | 0.30 | 30.29 | 0.01 |
| Trevisi et al. 2020 | -0.43 | -0.29 | 0.10 | 1.61 | 8.98 | 30.97 | 0.17 | 16.59 | -0.28 |

**B.**


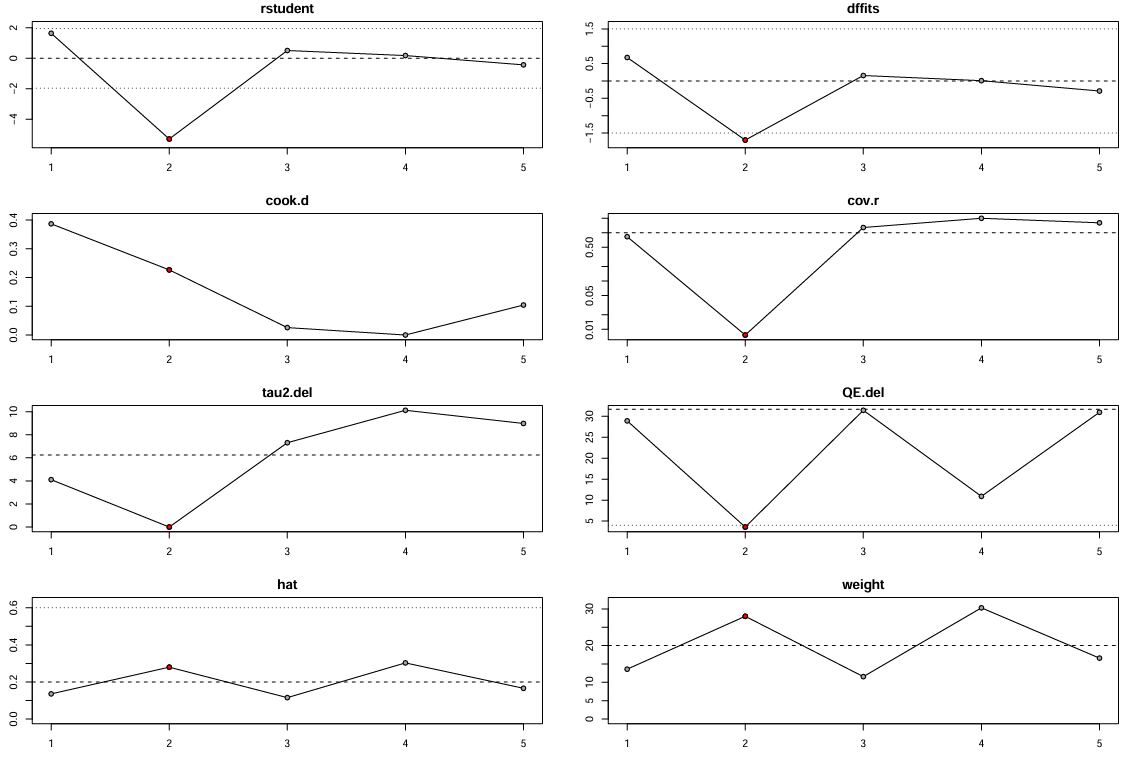


**Supplementary Figure 40. Influence Analysis of in-hospital mortality**

**A.**

| Study | rstudent | DFFITS | Cook’s d | cov.r | τ² | Q statistic | Hat | Weight | DFBETAS |
| --- | --- | --- | --- | --- | --- | --- | --- | --- | --- |
| Aziz et al. 2023 | -0.39 | -0.19 | 0.05 | 1.44 | 0.32 | 282.85 | 0.14 | 13.91 | -0.19 |
| Cook et al. 2025 | 2.30 | 0.43 | 0.17 | 0.87 | 0.19 | 284.83 | 0.04 | 3.82 | 0.46 |
| Czorlich et al. 2020 | -0.80 | -0.38 | 0.16 | 1.34 | 0.28 | 42.10 | 0.17 | 17.30 | -0.38 |
| Duehr et al. 2022 | -0.55 | -0.25 | 0.08 | 1.39 | 0.30 | 281.13 | 0.14 | 13.84 | -0.25 |
| Haddad et al. 2021 | 2.41 | 1.57 | 0.80 | 0.56 | 0.08 | 17.37 | 0.17 | 17.47 | 1.36 |
| Shahrokh et al. 2022 | 0.04 | -0.02 | 0.00 | 1.32 | 0.30 | 288.35 | 0.10 | 9.60 | -0.02 |
| Singh et al. 2025 | -1.61 | -0.51 | 0.23 | 0.94 | 0.19 | 277.85 | 0.11 | 10.66 | -0.52 |
| Trevisi et al. 2020 | 0.52 | 0.18 | 0.04 | 1.33 | 0.29 | 288.91 | 0.13 | 13.40 | 0.18 |

**B.**


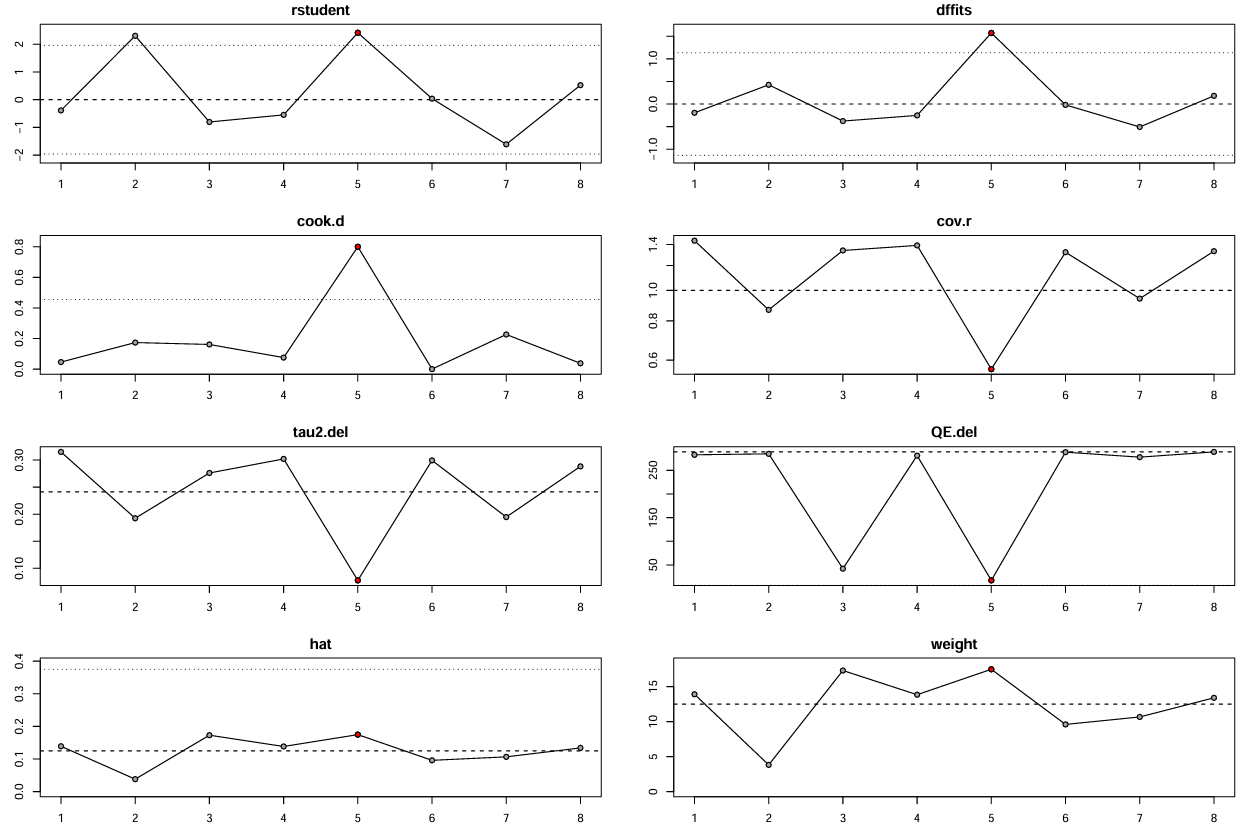


**Supplementary Figure 41. Influence Analysis of 30-day mortality**

**A.**

| Study | rstudent | DFFITS | Cook’s d | cov.r | τ² | Q statistic | Hat | Weight | DFBETAS |
| --- | --- | --- | --- | --- | --- | --- | --- | --- | --- |
| Castaño et al. 2024 | -1.60 | -1.01 | 0.74 | 0.77 | 0.00 | 0.04 | 0.28 | 28.49 | -1.12 |
| Duehr et al. 2022 | 1.30 | 1.62 | 1.29 | 1.63 | 0.00 | 0.92 | 0.53 | 53.11 | 1.48 |
| Gavrila et al. 2023 | 0.25 | 0.25 | 0.09 | 2.18 | 0.10 | 2.58 | 0.18 | 18.40 | 0.23 |

**B.**


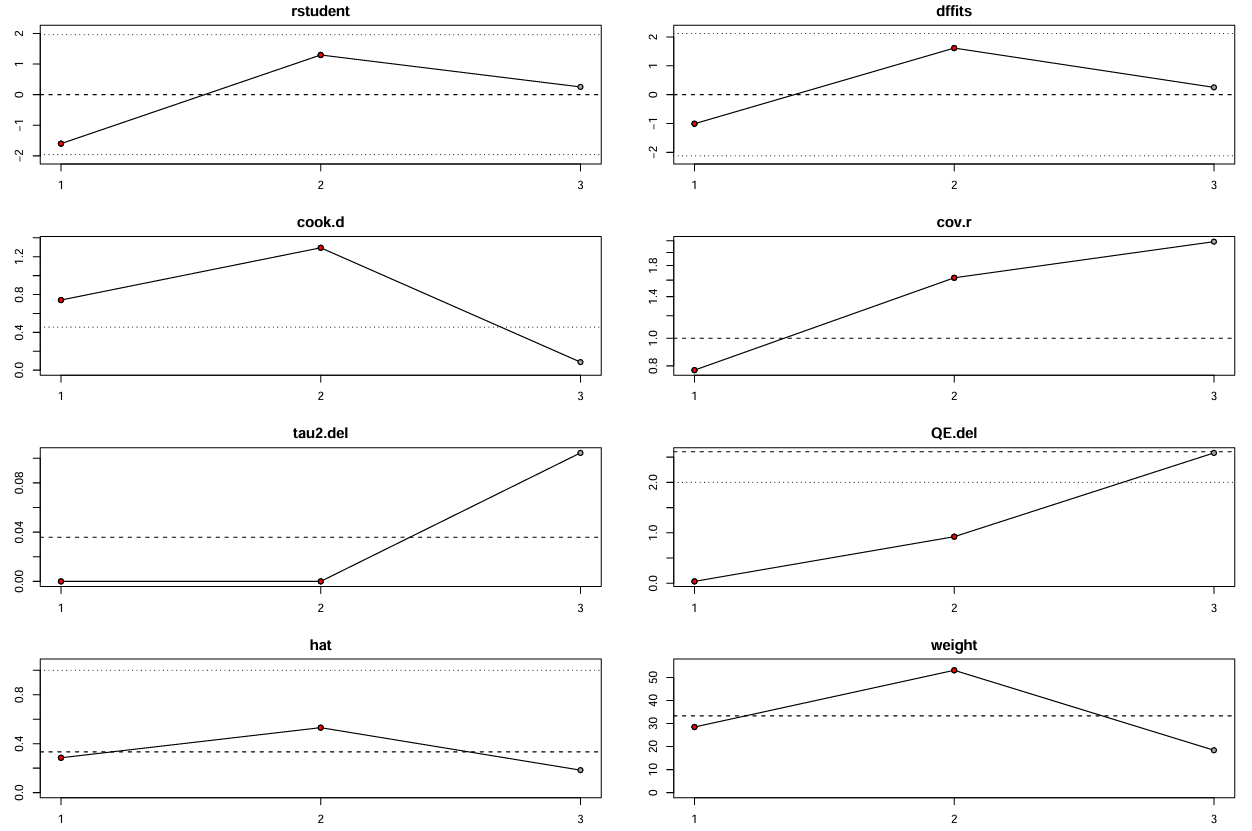


**Supplementary Figure 42. Influence Analysis of 6-month mortality**

**A.**

| Study | rstudent | DFFITS | Cook’s d | cov.r | τ² | Q statistic | Hat | Weight | DFBETAS |
| --- | --- | --- | --- | --- | --- | --- | --- | --- | --- |
| Aziz et al. 2023 | 0.35 | 0.15 | 0.03 | 1.42 | 0.10 | 21.31 | 0.16 | 15.85 | 0.15 |
| Castaño et al. 2024 | -1.19 | -0.38 | 0.14 | 1.06 | 0.08 | 18.04 | 0.09 | 9.37 | -0.38 |
| Duehr et al. 2022 | 0.63 | 0.27 | 0.08 | 1.32 | 0.09 | 20.82 | 0.15 | 15.07 | 0.27 |
| Gavrila et al. 2023 | -0.04 | -0.01 | 0.00 | 1.28 | 0.10 | 21.22 | 0.10 | 9.62 | -0.01 |
| Rajendran et al. 2025 | 1.33 | 0.42 | 0.17 | 1.03 | 0.07 | 19.29 | 0.10 | 9.77 | 0.43 |
| Shimoda et al. 2014 | 0.40 | 0.19 | 0.05 | 1.49 | 0.11 | 18.67 | 0.20 | 19.92 | 0.20 |
| Trevisi et al. 2020 | 0.38 | 0.10 | 0.01 | 1.15 | 0.09 | 21.28 | 0.06 | 5.88 | 0.10 |
| Wan et al. 2016 | -3.93 | -1.73 | 0.86 | 0.09 | 0.00 | 5.86 | 0.15 | 14.51 | -3.12 |

**B.**


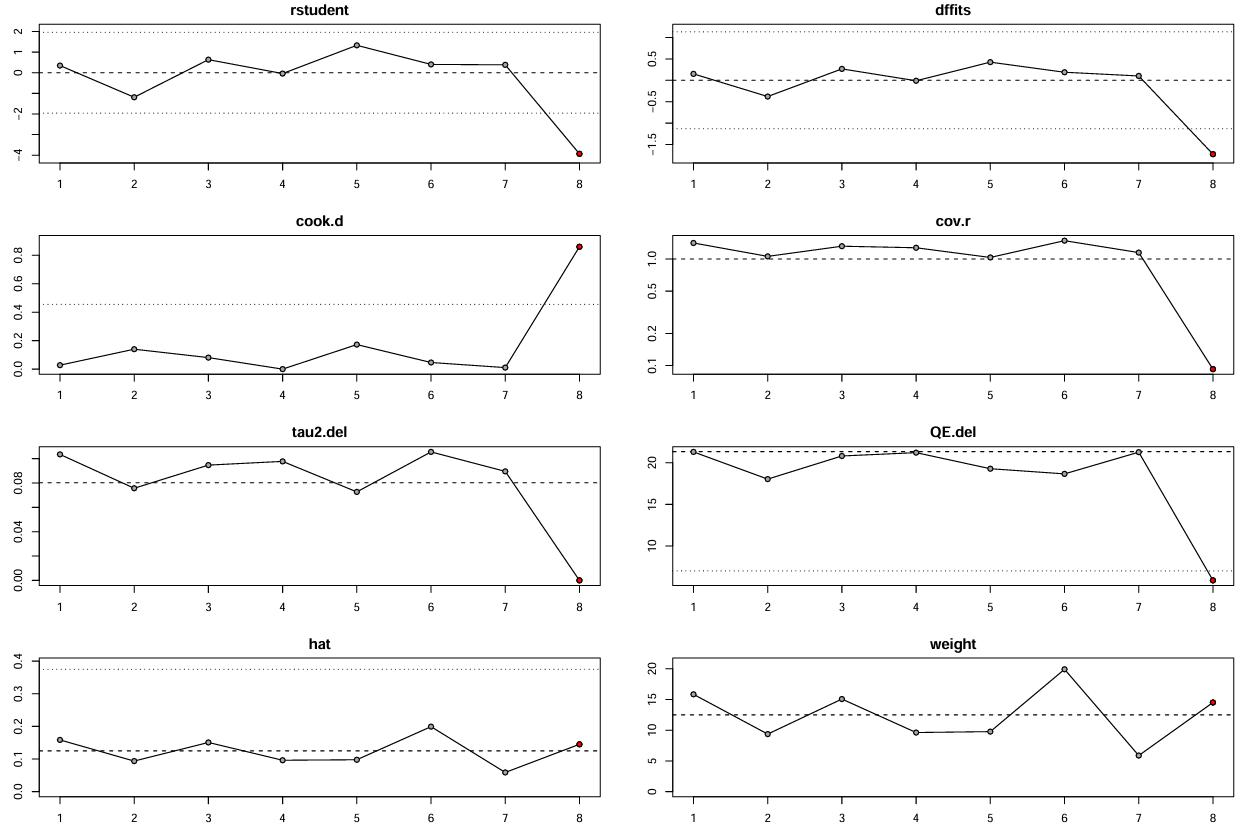


**Supplementary Figure 43. Influence Analysis of 12-month mortality**

**A.**

| Study | rstudent | DFFITS | Cook’s d | cov.r | τ² | Q statistic | Hat | Weight | DFBETAS |
| --- | --- | --- | --- | --- | --- | --- | --- | --- | --- |
| Castaño et al. 2024 | -1.81 | -1.38 | 0.75 | 0.33 | 0.00 | 0.00 | 0.43 | 42.83 | -1.76 |
| Duehr et al. 2022 | 1.81 | 2.66 | 1.34 | 0.92 | 0.00 | 0.00 | 0.57 | 57.17 | 2.35 |

**B.**


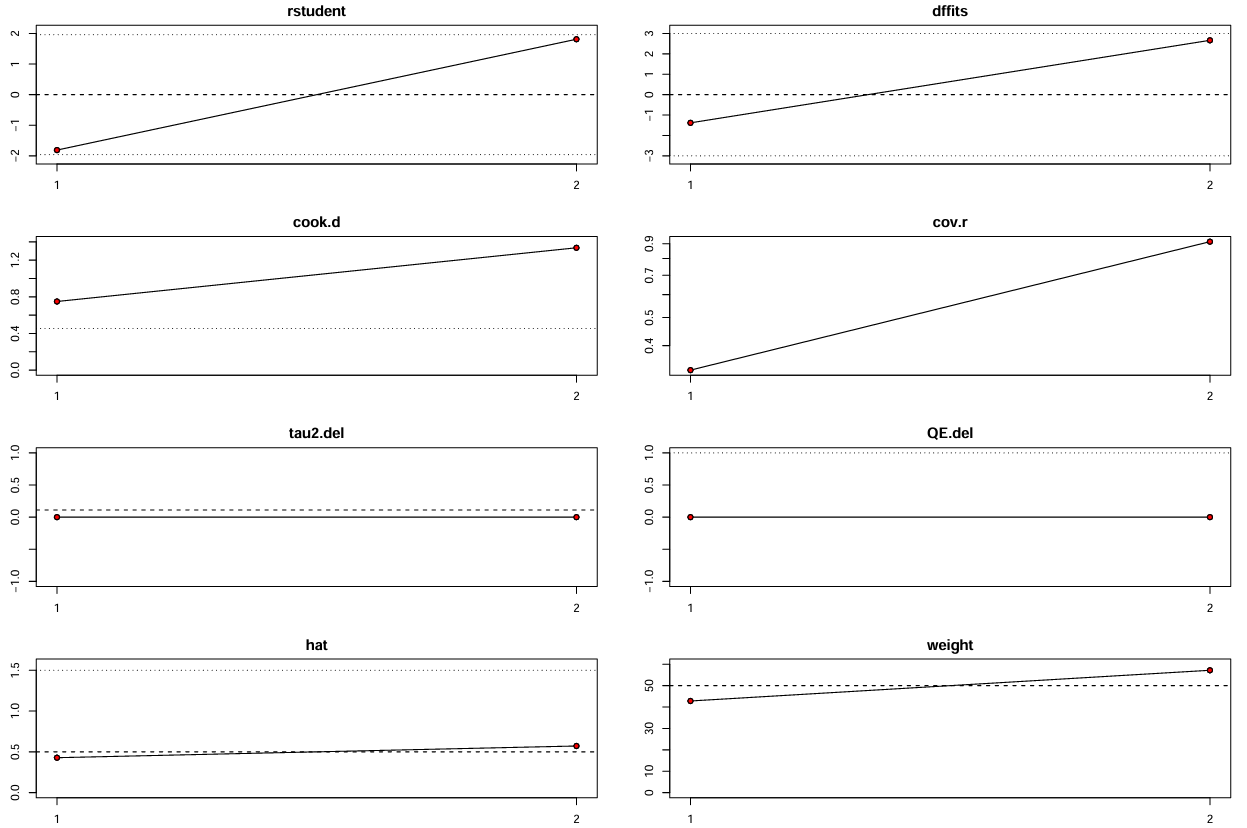

Supplement: Supplementary file 6 [file dcac6430bd1580b5e9504e13.docx]
