# Supplementary material
Source: Research Square preprint supplement (doi:10.21203/rs.3.rs-9362369/v1)
Supplement: Supplementary file 1 [file 028c203914a1f0b7a4a598ba.docx]

**Table 1.** Patient Characteristics at Admission

| Study Characteristics | | | | | | | Demographic characteristics | | Pre-injury Status | | | Injury Characteristics | | | Injury Severity | | Initial Clinical Presentation | |
| --- | --- | --- | --- | --- | --- | --- | --- | --- | --- | --- | --- | --- | --- | --- | --- | --- | --- | --- |
| Study ID | Country | Study design | Study period | Follow-up | Older adults included | Group | Age, years | Sex, male/female | Medication intake | Comorbidity burden | Frailty / Functional status | Mechanism of TBI | Context of TBI | Time from TBI to hospital admission, hours | Initial GCS score | ISS/Head AIS | Clinical presentation | Pupillary abnormalities |
| Aziz et al. 2023 | UK | Retrospective cohort | 2013-2019 | 6 months | ≥ 70 years | S  (n = 104) | 70-79 years: 120 (42.9)  80-90 years: 119 (42.5)  >90 years: 41 (14.6) | 158 (56.4)/122 (43.6) | Anticoagulation/antiplatelets: 124 (44.3) | - | WHO Performance Status scale (0-2): 175 (62.5)  WHO Performance Status scale (3-4): 74 (26.4) | Falls: 248 (88.6)  RTA: 15 (5.4)  Others/unknown: 17 (6.1) | - | - | 13-15: 190 (67.9)  9-12: 39 (13.9)  ≤8: 44 (15.7) | - | - | - |
| MM  (n = 176) |
| Bharanidharan et al. 2024 | India | Prospective cohort | 2021 | 3 months | ≥ 65 years | S  (n = 38) | 70.2 ± 5.2 | 144 (79.1)/38 (20.9) | Anticoagulation/antiplatelets: 41 (22.5)  Statins: 39 (21.4)  Beta Blockers: 33 (18.1) | HTN: 62 (34.1)  DM: 46 (25.3)  CAD: 35 (19.2)  CVA: 14 (7.7)  CKD: 4 (2.2)  Malignant disease: 3 (1.6)  Pulmonary disease: 3 (1.6) | - | Falls: 77 (42.3)  RTA: 100 (54.9)  Others/unknown: 5 (2.7) | Isolated TBI: 182 (100.0) | - | 13-15: 91 (50.0)  9-12: 68 (37.4)  ≤8: 23 (12.6) | - | - | - |
| MM  (n = 144) |
| Castaño et al. 2024 | Spain | Retrospective cohort  (PSM)* | 2013-2023 | 12 months | ≥ 65 years | S  (n = 31) | 74.7 ± 8.5 | 19 (61.3)/12 (38.7) | Anticoagulation: 11 (35.5)  Antiplatelets: 9 (29.0) | CCI: 4.3 ± 2.3  CCI without age factor: 1.3 ± 2.3 | Frailty (CFS 5–6): 2 (6.5) | Falls: 47 (75.8)  RTA: 10 (32.3)  Others: 5 (8.1) | Isolated TBI: 29 (93.5)  Polytrauma: 2 (6.5) | 7.9 ± 14.9 | 13-15: 11 (35.5)  9-12: 7 (22.6)  ≤8: 13 (41.9) | ISS: 22.0 ± 7.0 | GCS motor ≤ 3: 12 (38.7) | One non-reactive: 3 (9.7) |
| MM  (n = 31) | 74.0 ± 7.8 | 18 (58.1)/13 (41.9) | Anticoagulation: 8 (25.8)  Antiplatelets: 7 (22.6) | CCI: 4.0 ± 1.6  CCI without age factor: 1.0 ± 1.6 | Frailty (CFS 5–6): 2 (6.5) | Isolated TBI: 26 (83.9)  Polytrauma: 5 (16.1) | 4.3 ± 7.0 | 13-15: 15 (48.4)  9-12: 3 (9.7)  ≤8: 13 (41.9) | ISS: 23.3 ± 10.1 | GCS motor ≤ 3: 14 (45.2) | One non-reactive: 3 (9.7) |
| Cook et al. 2025 | USA | Retrospective cohort | 2013-2023 | In-hospital follow-up | ≥ 90 years | S  (n = 8) | 94.5 ± 2.7 | 4 (50.0)/4 (50.0) | Anticoagulation/antiplatelets: 6 (75.0) | - | Independent: 4 (50.0) | Falls: 7 (87.5) | - | - | 12.9 ± 2.3 | - | - | - |
| MM  (n = 109) | 98.0 ± 3.4 | 29 (26.6)/80 (73.4) | Anticoagulation/antiplatelets: 78 (71.6) | Independent: 57 (52.3) | Falls: 106 (97.2) | 14.0 ± 1.6 |
| Czorlich et al. 2020 | Germany | Retrospective cohort | 2002-2016 | In-hospital follow-up | ≥ 80 years | S  (n = 431) | - | 221 (51.3)/210 (48.7) | - | - | - | Falls: 325 (75.4)  RTA: 72 (16.7)  Others: 66 (15.3) | Isolated TBI: 431 (100.0) | - | ≤8: 209 (48.5) | Head AIS  3: 67 (15.5)  4: 83 (19.3)  5/6: 281 (65.2) | - | Sluggish light reaction: 111 (25.8)  Absent light reaction: 60 (13.9)  Anisocoric pupils: 83 (19.3)  Bilaterally fixed pupils: 34 (7.9) |
| MM  (n = 1,262) | 559 (44.3)/703 (55.7) | Falls: 994 (78.8)  RTA: 143 (11.3)  Others: 166 (13.2) | Isolated TBI: 1,262 (100.0) | ≤8: 587 (46.5) | Head AIS  3: 342 (27.1)  4: 334 (26.5)  5/6: 586 (46.4) | Sluggish light reaction: 279 (22.1)  Absent light reaction: 274 (21.7)  Anisocoric pupils: 229 (18.1)  Bilaterally fixed pupils: 129 (10.2) |
| Duehr et al. 2022 | USA | Retrospective cohort | 2015-2020 | 24 months | ≥ 80 years | S  (n = 35) | 85.0 ± 2.9 | 15 (42.9)/20 (57.1) | Anticoagulation/antiplatelets: 29 (82.9) | HTN: 22 (62.9)  AF: 17 (48.6)  CAD: 8 (22.9)  HLD: 7 (20.0)  DM: 6 (17.1)  Stroke/CVA: 6 (17.1)  Hypothyroidism: 5 (14.3)  Cancer: 4 (11.4)  CHF: 4 (11.4)  COPD: 3 (8.6)  CKD:3 (8.6)  Dementia: 2 (5.7)  Depression/Anxiety: 2 (5.7)  Parkinson's: 2 (5.7)  TIA: 2 (5.7)  RA: 0 (0.0) | - | - | - | - | 14.0 ± 5.2 | - | - | - |
| MM  (n = 69) | 87.3 ± 3.6 | 29 (42.0)/40 (58.0) | Anticoagulation/antiplatelets: 55 (79.7) | HTN: 41 (59.4)  AF: 25 (36.2)  CAD: 17 (24.6)  Hypothyroidism: 17 (24.6)  Depression/Anxiety: 13 (18.8)  HLD: 12 (17.4)  DM: 9 (13.0)  Cancer: 9 (13.0)  CHF: 9 (13.0)  Parkinson's: 6 (8.7)  TIA: 6 (8.7)  Dementia: 3 (4.3)  Stroke/CVA: 3 (4.3)  RA: 3 (4.3)  Renal disease: 2 (2.9)  COPD: 2 (2.9) | 14.0 ± 6.7 |
| Gavrila et al. 2023 | Belgium | Retrospective cohort | 1999-2019 | 6 months | ≥ 65 years | S  (n = 65) | 76.5 ± 6.5 | 32 (49.2)/33 (50.8) | Polypharmacy: 16 (24.6) | Cardiovascular: 27 (41.5)  DM: 8 (12.3)  Cancer: 6 (9.2)  COPD: 5 (7.7) | ADL dependency: 1 (1.5) | Falls: 50 (76.9) | - | - | 12.5 ± 4.9 | - | - | - |
| MM  (n = 84) | 77.0 ± 10.4 | 43 (51.2)/41 (48.8) | Polypharmacy: 20 (23.8) | Cardiovascular: 22 (26.2)  Cancer: 7 (8.3)  COPD: 5 (6.0)  DM: 2 (2.4) | ADL dependency: 2 (2.4) | Falls: 69 (82.1) | 14.0 ± 2.2 |
| Haddad et al. 2021 | USA | Retrospective cohort | 2003-2016 | In-hospital follow-up | ≥ 80 years | S  (n = 5,944) | 84.0 ± 2.7 | 3,578 (60.2)/2,366 (39.8) | Chronic steroids: 32 (0.5) | HTN: 3,789 (63.7)  Bleeding disorder: 1,557 (26.2)  DM: 1,336 (22.5)  CHF: 652 (11.0)  Dementia: 611 (10.3)  CVA: 484 (8.1)  Respiratory disease/COPD: 399 (6.7)  Major psychiatric disorder: 312 (5.2)  MI: 249 (4.2)  Chronic renal failure: 124 (2.1)  Cancer: 93 (1.6)  PVD: 78 (1.3)  Liver cirrhosis: 20 (0.3)  CCI: 4.8 ± 1.2 | Functionally dependent: 358 (6.0) | Falls: 5,309 (89.3)  RTA: 314 (5.3)  Others/unknown: 397 (6.7) | - | - | 12.4 ± 4.1 | ISS: 20.6 ± 6.5 | SBP: 154.5 ± 33.5 | - |
| MM  (n = 121,185) | 84.3 ± 2.8 | 53,806 (44.4)/67,379 (55.6) | Chronic steroids: 958 (0.8) | HTN: 74,617 (61.6)  Bleeding disorder: 26,269 (21.7)  DM: 25,064 (20.7)  Dementia: 18,119 (15.0)  CHF: 11,155 (9.2)  Respiratory disease/COPD: 9,242 (7.6)  CVA: 8,612 (7.1)  Major psychiatric disorder: 7,603 (6.3)  MI: 3,948 (3.3)  Chronic renal failure: 2,507 (2.1)  Cancer:1,830 (1.5)  PVD: 1,450 (1.2)  Liver cirrhosis: 374 (0.3)  CCI: 4.8 ± 1.2 | Functionally dependent:10,542 (8.7) | Falls: 77,411 (63.9)  RTA: 9,866 (8.1)  Others/unknown: 33,908 (28.0) | 13.7 ± 3.0 | ISS: 13.8 ± 8.2 | SBP: 151.1 ± 32.9 |
| Jyoti et al. 2025 | India | Retrospective cohort | 2021-2023 | 3 months | > 60 years | S  (n = 91) | 70.3 ± 7.2 | 89 (74.2)/31 (25.8) | Anticoagulation: 28 (23.3) | DM: 43 (35.8)  HTN: 37 (30.8)  CAD: 18 (15.0)  COPD: 13 (10.8)  CKD: 9 (7.5)  CVA: 9 (7.5)  PTB: 7 (5.8) | - | RTA: 63 (52.5)  Falls: 47 (39.2)  Others: 10 (8.3) | Isolated TBI: 81 (67.5)  Polytrauma: 39 (32.5) | 7.3 ± 6.0 | 7.3 ± 3.8 | - | Motor neurological deficit: 59 (49.2)  Seizures: 21 (17.5)  Vomiting: 58 (48.3)  Loss of consciousness: 115 (95.8) | Anisocoria: 45 (37.5) |
| MM  (n = 29) |
| Kumar et al. 2024 | India | Retrospective cohort | 2016-2020 | 6 months | ≥ 60 years | S  (n = 285) | 65.9 ± 7.9 | 498 (76.1)/156 (23.9) | - | DM: 68 (10.4)  HTN: 65 (9.9)  CAD: 24 (3.7)  COPD: 22 (3.4)  PTB: 19 (2.9)  CVA: 15 (2.3) | - | RTA: 448 (68.5) Falls: 136 (20.8)  Others: 98 (15.0) | - | 2.5 ± 6.4 | 9.5 ± 3.6 | - | Altered sensorium 566 (86.5)  Loss of consciousness: 472 (72.2)  Vomiting: 320 (48.9)  ENT bleed: 306 (46.8)  GCS motor ≤ 3: 127 (19.4)  CSF rhinorrhea 22 (3.4)  CSF otorrhea 20 (3.1)  Seizures 14 (2.1) | Anisocoria: 172 (26.3) |
| MM  (n = 369) |
| Rajendran et al. 2025 | India | Retrospective cohort  (PSM) | 2017-2018 | 1 year | ≥ 60 years | S  (n = 52) | 60-69 years: 43 (82.7)  70-79 years: 6 (11.5)  >80 years: 3 (5.8) | 40 (76.9)/12 (23.1) | - | HTN: 11 (21.2)  DM: 10 (19.2)  CAD: 0 (0.0)  Others: 2 (3.8) | - | - | Isolated TBI: 52 (100.0) | - | 13-15: 12 (23.1)  9-12: 25 (48.1)  ≤8: 15 (28.8) | - | Loss of consciousness: 40 (76.9)  Vomiting: 12 (23.1)  Otorrhagia: 10 (19.2)  Rhinorrhagia: 5 (9.6)  Seizures: 0 (0.0) | - |
| MM  (n = 52) | 60-69 years: 41 (78.8)  70-79 years: 7 (13.5)  >80 years: 4 (7.7) | 38 (73.1)/14 (26.9) | DM: 12 (23.1)  HTN: 16 (30.8)  CAD: 1 (1.9)  Others: 4 (7.7) | Isolated TBI: 52 (100.0) | 13-15: 10 (19.2)  9-12: 22 (42.3)  ≤8: 20 (38.5) | Loss of consciousness: 42 (80.8)  Vomiting: 23 (44.2)  Otorrhagia: 22 (42.3)  Rhinorrhagia: 13 (25.0)  Seizures: 5 (9.6) |
| Shahrokh et al. 2022 | Iran | Retrospective cohort | - | In-hospital follow-up | > 65 years | S  (n = 119) | 68.5 ± 4.2 | 82 (68.9)/37 (31.1) | - | - | - | RTA: 59 (49.6)  Falls: 38 (31.9)  Others: 22 (18.5) | - | - | 10.2 ± 2.4 | - | Otorrhea: 13 (10.9)  Rhinorrhea: 11 (9.2) | - |
| MM  (n = 119) | 67.8 ± 3.9 | 84 (70.6)/35 (29.4) | RTA: 61 (51.3)  Falls: 33 (27.7)  Others: 25 (21.0) | 10.3 ± 2.4 | Otorrhea: 17 (14.3)  Rhinorrhea: 11 (9.2) |
| Shimoda et al. 2014 | Japan | Retrospective cohort | 1998-2011 | 6 months | ≥ 65 years | S  (n = 478) | 76.0 ± 7.2 | 299 (62.6)/176 (36.8) | - | - | - | Falls: 224 (46.9)  RTA: 105 (22.0)  Others: 27 (5.6) | - | - | 9-15:168 (35.1)  ≤8: 310 (64.9) | - | Hypotension: 28 (5.9)  Hypoxia: 24 (5.0) | - |
| MM  (n = 410) | 77.0 ± 7.5 | 247 (60.2)/161 (39.3) | Falls:149 (36.3)  RTA: 103 (25.1)  Others: 23 (5.6) | 9-15: 42 (10.2)  ≤8: 368 (89.8) | Hypotension: 74 (18.0)  Hypoxia: 32 (7.8) |
| Singh et al. 2025 | India | Retrospective cohort | 2014-2024 | In-hospital follow-up | ≥ 60 years | S  (n = 270) | 68.4 ± 6.2 | 521 (67.0)/257 (33.0) | Anticoagulation: 75 (9.6) | HTN: 392 (50.4)  DM: 268 (34.4)  IHD: 133 (17.1) | Independence: 711 (91.4) | Falls: 437 (56.2)  RTA: 289 (37.1)  Others: 52 (6.7) | - | - | 12.8 ± 3.4 | - | Hypotensive: 102 (13.1)  Hypertensive: 176 (22.6) | Unilateral non-reactive: 87 (11.2)  Bilateral non-reactive: 36 (4.6) |
| MM  (n = 508) |
| Trevisi et al. 2020 | Italy | Retrospective cohort | 2016-2019 | 6 months | ≥ 70 years | S  (n = 147) | 78.0 ± 6.0 | 85 (57.8)/62 (42.2) | Anticoagulation/antiplatelets: 92 (62.6) | CCI: 5.2 ± 1.7 | - | Falls: 126 (85.7)  RTA: 10 (6.8)  Others: 77 (52.4) | - | - | 10.0 ± 3.0 | - | Neurological deficits: 51 (34.7)  GCS decrease within 72 h: 34 (23.1)  Urgent coagulopathy correction: 30 (20.4)  New or worsening neurological deficits / seizures: 29 (19.7)  Radiological worsening: 28 (19.0)  Worsening of MLS: 28 (19.0)  Worsening of SDH thickness: 26 (17.7) Seizures: 7 (4.8) | Anisocoric: 37 (25.2)  Fixed: 11 (7.5) |
| MM  (n = 66) | 83.0 ± 7.0 | 27(40.9)/39 (59.1) | Anticoagulation/antiplatelets: 55 (83.3) | CCI: 5.4 ± 1.6 | 13.0 ± 3.0 | Neurological deficits: 21 (31.8)  Radiological worsening: 15 (22.7)  Worsening of SDH thickness: 14 (21.2)  Worsening of MLS: 11 (16.7)  New or worsening neurological deficits / seizures: 11 (16.7)  Seizures: 6 (9.1)  GCS decrease within 72 h: 3 (4.5)  Urgent coagulopathy correction: 2 (3.0) | Anisocoric: 7 (10.6)  Fixed: 1 (1.5) |
| Wan et al. 2016 | China | Retrospective cohort | 2008-2014 | 6 months | ≥ 65 years | S  (n = 70) | 73.0 ± 4.2 | 51 (72.9)/19 (27.1) | - | Comorbidity: 29 (41.4) | - | Falls: 40 (57.1)  RTA: 26 (37.1)  Others: 4 (5.7) | Isolated TBI: 70 (100.0) | - | 3-5: 25 (35.7)  6-8: 45 (64.3) | - | - | 38 (54.3) |
| MM  (n = 42) | 74.5 ± 6.2 | 31 (73.8)/11 (26.2) | Comorbidity: 22 (52.4) | Falls: 25 (59.5)  RTA: 12 (28.6)  Others: 5 (11.9) | Isolated TBI: 42 (100.0) | 3-5: 15 (35.7)  6-8: 27 (64.3) | 21 (50.0) |
