# Supplementary material
Source: Research Square preprint supplement (doi:10.21203/rs.3.rs-9362369/v1)
Supplement: Supplementary file 2 [file 6d05690b7acb1943fdd58713.docx]

**Table 3.** Summary of Meta-Analysis

| Subgroup | Number of studies | Number of patients | Pooled effect | 95% CI | 95% PI | p-value | I² |
| --- | --- | --- | --- | --- | --- | --- | --- |
| Favorable neurological outcome at discharge | | | | | | | |
| Overall | 6 | 3,384 | RR = 0.72 | 0.45-1.13 | 0.23-2.26 | 0.12 | 92.0% |
| Unmatched studies | 6 | 3,384 | RR = 0.72 | 0.45-1.13 | 0.23-2.26 | 0.12 | 92.0% |
| Older adults aged 65 and over | 5 | 2,606 | RR = 0.65 | 0.39-1.09 | 0.19-2.17 | 0.08 | 89.5% |
| Older adults aged 70 and over | 3 | 2,186 | RR = 0.60 | 0.15-2.40 | 0.04-9.01 | 0.26 | 94.0% |
| Older adults aged 80 and over | 1 | 1,693 | RR = 0.96 | 0.84-1.10 | - | 0.56 | - |
| Older adults with SDH | 2 | 493 | RR = 0.46 | 0.00-44.59 | 0.00-783.89 | 0.28 | 82.1% |
| Older adults with isolated TBI | 2 | 1,875 | RR = 0.94 | 0.48-1.84 | 0.43-2.02 | 0.44 | 0.0% |
| Older adults with mild TBI | 1 | 82 | RR = 0.48 | 0.32-0.73 | - | **<0.001** | - |
| Older adults with moderate TBI | 1 | 45 | RR = 3.00 | 0.45-20.15 | - | 0.26 | - |
| Older adults with severe TBI | 1 | 86 | RR = 0.72 | 0.10-5.12 | - | 0.74 | - |
| Favorable neurological outcome at 3 months | | | | | | | |
| Overall | 1 | 120 | RR = 0.64 | 0.26-1.55 | - | 0.32 | - |
| Favorable neurological outcome at 6 months | | | | | | | |
| Overall | 7 | 2,313 | RR = 1.30 | 0.55-3.08 | 0.15-11.04 | 0.48 | 90.5% |
| Matched studies | 2 | 166 | RR = 1.01 | 0.11-9.47 | 0.09-11.18 | 0.98 | 0.0% |
| Unmatched studies | 5 | 2,147 | RR = 1.45 | 0.34-6.10 | 0.06-36.69 | 0.51 | 93.6% |
| Older adults aged 65 and over | 5 | 1,555 | RR = 1.58 | 0.38-6.59 | 0.06-39.85 | 0.42 | 93.6% |
| Older adults aged 70 and over | 2 | 493 | RR = 0.67 | 0.00-1302.84 | 0.00-272396.40 | 0.62 | 95.4% |
| Older adults with SDH | 3 | 1,381 | RR = 1.05 | 0.09-12.32 | 0.01-133.73 | 0.94 | 96.1% |
| Older adults with isolated TBI | 2 | 216 | RR = 2.75 | 0.00-9411742.91 | 0.00-259901619800.21 | 0.55 | 90.5% |
| Favorable neurological outcome at 12 months | | | | | | | |
| Overall | 1 | 62 | RR = 1.86 | 0.86-4.02 | - | 0.12 | - |
| Hospital length of stay | | | | | | | |
| Overall | 5 | 127,888 | MD = 6.35 | 2.55 to 10.14 | -1.57 to 14.27 | **<0.01** | 87.4% |
| Unmatched studies | 5 | 127,888 | MD = 6.35 | 2.55 to 10.14 | -1.57 to 14.27 | **<0.01** | 87.4% |
| Older adults aged 65 and over | 5 | 127,888 | MD = 6.35 | 2.55 to 10.14 | -1.57 to 14.27 | **<0.01** | 87.4% |
| Older adults aged 70 and over | 4 | 127,739 | MD = 6.13 | 0.92 to 11.33 | -3.81 to 16.06 | **0.03** | 90.5% |
| Older adults aged 80 and over | 2 | 127,246 | MD = 5.12 | -19.65 to 29.88 | -37.28 to 47.51 | 0.23 | 96.4% |
| Older adults with SDH | 4 | 759 | MD = 6.34 | 0.35 to 12.32 | -5.53 to 18.20 | **0.04** | 72.5% |
| In-hospital mortality | | | | | | | |
| Overall | 8 | 130,552 | RR = 1.33 | 0.75-2.36 | 0.38-4.69 | 0.28 | 97.6% |
| Unmatched studies | 8 | 130,552 | RR = 1.33 | 0.75-2.36 | 0.38-4.69 | 0.28 | 97.6% |
| Older adults aged 65 and over | 7 | 129,774 | RR = 1.47 | 0.83-2.60 | 0.45-4.80 | 0.28 | 97.8% |
| Older adults aged 70 and over | 6 | 129,536 | RR = 1.50 | 0.73-3.07 | 0.37-6.04 | 0.21 | 98.2% |
| Older adults aged 80 and over | 4 | 129,043 | RR = 1.76 | 0.34-8.99 | 0.10-32.52 | 0.35 | 98.9% |
| Older adults with SDH | 4 | 714 | RR = 1.49 | 0.42-5.36 | 0.26-8.45 | 0.39 | 68.6% |
| Older adults with isolated TBI | 1 | 1,693 | RR = 0.91 | 0.81-1.01 | - | 0.08 | - |
| Older adults with mild TBI | 2 | 272 | RR = 1.78 | 0.00-32148.02 | 0.00-6686374.03 | 0.59 | 69.2% |
| Older adults with moderate TBI | 2 | 83 | RR = 0.45 | 0.09-2.34 | 0.01-26.94 | 0.10 | 0.0% |
| Older adults with severe TBI | 2 | 130 | RR = 0.67 | 0.16-2.82 | 0.08-5.64 | 0.18 | 0.0% |
| 30-day mortality | | | | | | | |
| Overall | 3 | 315 | RR = 0.67 | 0.31-1.46 | 0.21-2.16 | 0.16 | 23.3% |
| Matched studies | 1 | 62 | RR = 0.45 | 0.24-0.83 | - | **0.01** | - |
| Unmatched studies | 2 | 253 | RR = 0.79 | 0.52-1.21 | 0.09-6.95 | 0.09 | 0.0% |
| Older adults aged 65 and over | 3 | 315 | RR = 0.67 | 0.31-1.46 | 0.21-2.16 | 0.16 | 23.3% |
| Older adults aged 80 and over | 1 | 104 | RR = 0.81 | 0.56-1.17 | - | 0.25 | - |
| Older adults with SDH | 2 | 253 | RR = 0.79 | 0.52-1.21 | 0.09-6.95 | 0.09 | 0.0% |
| 3-month mortality | | | | | | | |
| Overall | 1 | 104 | RR = 0.88 | 0.63-1.22 | - | 0.44 | - |
| 6-month mortality | | | | | | | |
| Overall | 8 | 1,912 | RR = 0.68 | 0.51-0.92 | 0.33-1.43 | **0.02** | 67.2% |
| Matched studies | 2 | 166 | RR = 0.70 | 0.00-337.17 | 0.00-15312.20 | 0.60 | 80.8% |
| Unmatched studies | 6 | 1,746 | RR = 0.68 | 0.49-0.94 | 0.32-1.46 | **0.03** | 68.9% |
| Older adults aged 65 and over | 7 | 1,808 | RR = 0.65 | 0.48-0.88 | 0.31-1.35 | **0.01** | 68.9% |
| Older adults aged 70 and over | 3 | 597 | RR = 0.80 | 0.70-0.92 | 0.50-1.28 | **0.02** | 0.0% |
| Older adults aged 80and over | 1 | 104 | RR = 0.84 | 0.60-1.17 | - | 0.30 | - |
| Older adults with SDH | 6 | 1,738 | RR = 0.78 | 0.73-0.83 | 0.70-0.86 | **<0.001** | 0.0% |
| Older adults with isolated TBI | 2 | 216 | RR = 0.63 | 0.00-734.28 | 0.00-86671.93 | 0.56 | 90.3% |
| Older adults with mild TBI | 1 | 190 | RR = 0.57 | 0.34-0.97 | - | **0.04** | - |
| Older adults with moderate TBI | 2 | 86 | RR = 0.85 | 0.00-17687.35 | 0.00-11086921.16 | 0.87 | 85.3% |
| Older adults with severe TBI | 2 | 79 | RR = 0.83 | 0.38-1.82 | 0.19-3.62 | 0.20 | 0.0% |
| 12-month mortality | | | | | | | |
| Overall | 2 | 166 | RR = 0.69 | 0.02-24.31 | 0.00-175.80 | 0.41 | 69.5% |
| Matched studies | 1 | 62 | RR = 0.50 | 0.30-0.85 | - | **0.01** | - |
| Unmatched studies | 1 | 104 | RR = 0.88 | 0.64-1.21 | - | 0.43 | - |
| Older adults aged 65 and over | 2 | 166 | RR = 0.69 | 0.02-24.31 | 0.00-175.80 | 0.41 | 69.5% |
| Older adults aged 80 and over | 1 | 104 | RR = 0.88 | 0.64-1.21 | - | 0.43 | - |
| Older adults with SDH | 1 | 104 | RR = 0.88 | 0.64-1.21 | - | 0.43 | - |
| 24-month mortality | | | | | | | |
| Overall | 1 | 104 | RR = 0.86 | 0.63-1.18 | - | 0.35 | - |
