# Supplementary material
Source: Research Square preprint supplement (doi:10.21203/rs.3.rs-9362369/v1)
Supplement: Supplementary file 3 [file 6dfbfbbeb097066594694ea5.docx]

**Table 2.** Neuroimaging Findings and Management Strategies

| Study Characteristics | | Neuroimaging Findings | | | | | | | Management and Interventions | | | | |
| --- | --- | --- | --- | --- | --- | --- | --- | --- | --- | --- | --- | --- | --- |
| Study ID | Group | CT scores | Skull fracture | Basal Cisterns Status | Midline shift | Edema/swelling | Hematoma  volume | Type of hemorrhage | Type of surgery | Time from hospital admission to surgery, hours | Time from TBI to surgery, days | ICP monitoring | Limitation of life-sustaining treatment |
| Aziz et al. 2023 | S  (n = 104) | - | - | - | - | - | - | SDH only: 191 (68.2)  SDH plus others: 89 (31.8) | Burr holes: 53 (51.0)  Craniotomy: 41 (39.4)  DC: 4 (3.8)  Others: 1 (1.0) | - | - | ICP bolt: 7 (6.7) | - |
| MM  (n = 176) | 0 (0.0) | 0 (0.0) |
| Bharanidharan et al. 2024 | S  (n = 38) | Marshall score: 2.7 ± 1.4  Rotterdam Score: 3.0 ± 1.0 | 70 (38.5) | Open: 115 (63.2)  Effaced: 54 (29.7)  Absent: 13 (7.1) | 52 (28.6) | - | - | Contusion: 55 (30.2)  SDH: 53 (29.1)  IVH/SAH: 49 (26.9)  ICH: 11 (6.0)  EDH: 6 (3.3) | - | - | - | - | - |
| MM  (n = 144) |
| Castaño et al. 2024 | S  (n = 31) | Rotterdam Score: 4.0 ± 1.6 | - | Effaced: 17 (54.8) | 6.7 ± 5.4 | 17 (54.8) | SDH: 27.7 ± 29.5 cm3  ICH: 6.7 ± 15.5 cm3 | SDH: 30 (96.8)  SAH: 21 (67.7)  ICH: 12 (38.7)  IVH: 8 (25.8)  EDH: 0 (0.0) | Craniotomy or DC | - | Within 48 h after injury | - | 0 (0.0) |
| MM  (n = 31) | Rotterdam Score: 4.0 ± 1.6 | Effaced: 19 (61.3) | 5.7 ± 10.1 | 15 (48.4) | SDH: 16.3 ± 19.4 cm3  ICH: 9.7 ± 17.1 cm3 | SDH: 27 (87.1)  SAH: 24 (77.4)  ICH: 20 (64.5)  IVH: 7 (22.6)  EDH: 2 (6.5) | 0 (0.0) | 0 (0.0) | 0 (0.0) |
| Cook et al. 2025 | S  (n = 8) | - | - | - | 6.2 ± 3.2 | - | - | SDH: 8 (100.0)  SAH: 1 (12.5)  IVH: 0 (0.0)  Contusion: 0 (0.0) | Craniotomy: 8 (100.0) | - | - | - | - |
| MM  (n = 109) | 1.1 ± 3.0 | SDH: 109 (100.0)  SAH: 23 (21.1)  Contusion: 7 (6.4)  IVH: 1 (0.9) | 0 (0.0) |
| Czorlich et al. 2020 | S  (n = 431) | - | 162 (37.6) | - | - | 57 (13.2) | - | SDH: 325 (75.4)  SAH: 130 (30.2)  ICH: 91 (21.1)  EDH: 26 (6.0)  Brainstem hemorrhage: 15 (3.5) | Burr hole: 159 (36.9)  DC: 144 (33.4)  Others: 128 (29.7) | - | - | - | - |
| MM  (n = 1,262) | 509 (40.3) | 136 (10.8) | SDH: 664 (52.6)  SAH: 400 (31.7)  ICH: 391 (31.0)  EDH: 63 (5.0)  Brainstem hemorrhage: 100 (7.9) | 0 (0.0) |
| Duehr et al. 2022 | S  (n = 35) | - | - | - | - | - | - | SDH: 35 (100.0) | Craniotomy: 35 (100.0) | - | - | - | - |
| MM  (n = 69) | SDH: 69 (100.0) | 0 (0.0) |
| Gavrila et al. 2023 | S  (n = 65) | Marshall score: 3.5 ± 1.7 | 14 (21.5) | - | 41 (63.1)  5.2 ± 4.1 | - | SDH: 12.3 ± 15.4 mL | SDH: 65 (100.0)  SAH: 12 (18.5)  Contusion: 12 (18.5)  EDH: 3 (4.6)  ICH: 0 (0.0) | Craniotomy: 65 (100.0) | - | 9.1 ± 14.7 | - | - |
| MM  (n = 84) | Marshall score: 2.0 ± 0.7 | 25 (29.8) | 19 (22.6)  0.0 ± 1.5 | SDH: 5.2 ± 4.1 mL | SDH: 84 (100.0)  SAH: 32 (38.1)  Contusion: 28 (33.3)  EDH: 9 (10.7)  ICH: 2 (2.4) | 0 (0.0) | 0 (0.0) |
| Haddad et al. 2021 | S  (n = 5,944) | - | - | - | - | - | - | - | - | - | - | - | Advanced directive limiting care: 374 (6.3) |
| MM  (n = 121,185) | Advanced directive limiting care: 8,797 (7.3) |
| Jyoti et al. 2025 | S  (n = 91) | - | 39 (32.5) | Effaced: 93 (77.5)  Open: 27 (22.5) | 6.3 ± 3.8 | - | Thickness of SDH: 9.7 ± 5.3 mm  EDH volume: 45.8 ± 35.6 cm3  Contusion volume: 30.0 ± 15.0 cm3 | SDH: 88 (73.3)  SAH: 84 (70.0)  Contusion: 76 (63.3)  IVH: 26 (21.7)  EDH: 22 (18.3) | DC: 74 (81.3)  Craniotomy: 17 (18.7) | - | - | - | - |
| MM  (n = 29) | 0 (0.0) |
| Kumar et al. 2024 | S  (n = 285) | Marshall score: 2.6 ± 1.0 | 5 (1.8) | - | - | - | - | Contusion: 136 (47.7)  SDH: 103 (36.1)  EDH: 40 (14.0)  Basal ganglia bleed: 1 (0.4)  IVH: 0 (0.0)  SAH: 0 (0.0) | Craniotomy: 165 (57.9)  DC: 93 (32.6)  Burr hole: 27 (9.5) | - | - | - | - |
| MM  (n = 369) | 2 (0.5) | Contusion: 248 (67.2)  SDH: 63 (17.1)  EDH: 9 (2.4)  IVH: 7 (1.9) SAH: 6 (1.6)  Basal ganglia bleed: 3 (0.8) | 0 (0.0) |
| Rajendran et al. 2025 | S  (n = 52) | - | 16 (30.8) | - | 17 (32.7) | - | - | SDH: 33 (63.5)  Contusion: 31 (59.6)  SAH: 9 (17.3)  EDH: 3 (5.8)  ICH: 1 (1.9) | Craniotomy or burr‐hole | - | - | - | - |
| MM  (n = 52) | 14 (26.9) | 18 (34.6) | SDH: 36 (69.2)  Contusion: 34 (65.4)  EDH: 7 (13.5)  SAH: 5 (9.6)  ICH: 2 (3.8) | 0 (0.0) |
| Shahrokh et al. 2022 | S  (n = 119) | - | - | - | - | - | - | - | DC: 39 (32.7)  Craniotomy: 32 (26.9) | - | - | EVD: 10 (8.4) | - |
| MM  (n = 119) | 0 (0.0) | 0 (0.0) |
| Shimoda et al. 2014* | S  (n = 478) | - | - | - | - | - | - | - | DC, craniotomy, or Burr-hole | - | - | 183 (38.3) | - |
| MM  (n = 410) | 0 (0.0) | 17 (4.1) |
| Singh et al. 2025 | S  (n = 270) | - | 29 (3.7) | - | - | - | - | SDH: 394 (50.6)  EDH: 158 (20.3)  Contusion: 126 (16.2) | Craniotomy: 166 (61.5)  DC: 58 (21.5) | - | - | - | - |
| MM  (n = 508) | 0 (0.0) |
| Trevisi et al. 2020 | S  (n = 147) | - | - | - | 9.0 ± 6.0 | - | Thickness of SDH: 16.0 ± 7.0 mm | SDH: 147 (100.0) | Craniotomy or DC | <6: 36 (24.5)  6–12: 27 (18.4)  12-24: 54 (36.7)  24-48: 6 (4.1)  48-72: 8 (5.4)  >72: 16 (10.9) | - | - | - |
| MM  (n = 66) | 5.0 ± 6.0 | Thickness of SDH: 13.0 ± 7.0 mm | SDH: 66 (100.0) | 0 (0.0) |  |
| Wan et al. 2016 | S  (n = 70) | - | - | Effaced: 67 (95.7)  Open: 3 (4.3) | 9.3 ± 4.0 | - | 47.1 ± 19.9 mL | SDH: 26 (37.1) | Craniotomy: 70 (100.0) | - | - | - | - |
| MM  (n = 42) | Effaced: 39 (92.9)  Open: 3 (7.1) | 8.1 ± 4.6 | 46.5 ± 21.6 mL | SDH: 20 (47.6) | 0 (0.0) |
