# Supplementary material
Source: Research Square preprint supplement (doi:10.21203/rs.3.rs-9362369/v1)
Supplement: Supplementary file 5 [file 913e521402d895d75246c859.docx]

**Table 1. Patient Characteristics at Admission**

Data are presented as frequency (percentage %) or mean ± standard deviation.

Abbreviations: ADL, Activities of Daily Living; AF, Atrial Fibrillation; AIS, Abbreviated Injury Scale; CAD, Coronary Artery Disease; CCI, Charlson Comorbidity Index; CFS, Clinical Frailty Scale; CHF, Congestive Heart Failure; CKD, Chronic Kidney Disease; COPD, Chronic Obstructive Pulmonary Disease; CSF, Cerebrospinal Fluid; CVA, Cerebrovascular Accident; DM, Diabetes Mellitus; ENT, Ear, Nose, and Throat; GCS, Glasgow Coma Scale; HLD, Hyperlipidemia; HTN, Hypertension; IHD, Ischemic Heart Disease; ISS, Injury Severity Score; MI, Myocardial Infarction; MM, Medical Management; MLS, Midline Shift; PSM, Propensity Score Matching; RTA, Road Traffic Accident; PTB, Pulmonary Tuberculosis; RA, Rheumatoid Arthritis; S, Surgical Management; SBP, Systolic Blood Pressure; TIA, Transient Ischemic Attack; TBI, Traumatic Brain Injury; WHO, World Health Organization.

*A 1:1 nearest-neighbor propensity score matching without replacement was performed using a caliper width of 0.2 standard deviations of the logit of the propensity score. Age, CFS, CCI (excluding age factor), ASA score, anticoagulants, hypoxia, shock, MEI, pupillary abnormalities and motor response upon admission, MLS, basal cistern effacement, volume of SDH and ICH, and LLST after 48 h after admission.

**PSM was performed in a 1:1 ratio using a binary logistic regression model to estimate the probability of receiving surgical treatment based on age, sex, CT findings, and symptoms. Nearest-neighbor matching with a caliper of 0.25 was applied. Covariate balance was evaluated post-matching by comparing distributions between groups to confirm adequate reduction of confounding and achieve pseudo-randomization.

**Table 2. Neuroimaging Findings and Management Strategies**

Data are presented as frequency (percentage %) or mean ± standard deviation.

Abbreviations: CT, Computed Tomography; DC, Decompressive Craniectomy; EDH, Epidural Hematoma; EVD, External Ventricular Drain; ICH, Intracerebral Hemorrhage; ICP, Intracranial Pressure; IVH, Intraventricular Hemorrhage; MM, Medical Management; SAH, Subarachnoid Hemorrhage; SDH, Subdural Hematoma; S, Surgical Group; TBI, Traumatic Brain Injury;

*A 1:1 nearest-neighbor propensity score matching without replacement was performed using a caliper width of 0.2 standard deviations of the logit of the propensity score.

age, CFS, CCI (excluding age factor), ASA score, anticoagulants, hypoxia, shock, MEI, pupillary abnormalities and motor response upon

admission, MLS, basal cistern effacement, volume of SDH and ICH, and LLST after 48 h after admission.

**PSM was performed in a 1:1 ratio using a binary logistic regression model to estimate the probability of receiving surgical treatment based on age, sex, CT findings, and symptoms. Nearest-neighbor matching with a caliper of 0.25 was applied. Covariate balance was evaluated post-matching by comparing distributions between groups to confirm adequate reduction of confounding and achieve pseudo-randomization.

**Table 3. Summary of Meta-Analysis**

Abbreviations: CI, Confidence Interval; I², I-squared statistic; MD, Mean Difference; PI, Prediction Interval; RR, Risk Ratio; SDH, Subdural Hematoma; TBI, Traumatic Brain Injury.

**Table 4. Summary of Certainty of the Evidence**

Abbreviations: CI: confidence interval; MD: mean difference; RR: risk ratio

Explanations:

a. All included studies were judged to have a moderate risk of bias.

b. Substantial heterogeneity was observed (I² = 92%).

c. The confidence interval was wide and crossed the line of no effect, including both clinically important benefit and harm.

d. The single included study was judged to have a moderate risk of bias.

e. Only one study was included; inconsistency could not be assessed.

f. Most included studies had a moderate risk of bias.

g. Substantial heterogeneity was observed (I² = 90.5%).

h. Substantial heterogeneity was observed (I² = 87.4%).

i. Substantial heterogeneity was observed (I² = 97.6%).

j. Minor asymmetry was observed (LFK index = -1.58).

k. Substantial heterogeneity was observed (I² = 67.2%).

l. Substantial heterogeneity was observed (I² = 69.5%).

m. Minor asymmetry was observed (LFK index = -1.41)
