# Supplementary material
Source: Research Square preprint supplement (doi:10.21203/rs.3.rs-9362369/v1)
Supplement: Supplementary file 7 [file ef4dd6300559381b95eeee1a.docx]

**Table 4.** Summary of Certainty of the Evidence

| **Outcome** | **Certainty assessment** | | | | | | | **№ of patients** | | **Effect** | | **Certainty** |
| --- | --- | --- | --- | --- | --- | --- | --- | --- | --- | --- | --- | --- |
| **№ of studies** | **Study design** | **Risk of bias** | **Inconsistency** | **Indirectness** | **Imprecision** | **Other considerations** | **Surgical Management** | **Medical Management** | **Relative  (95% CI)** | **Absolute  (95% CI)** |
| Favorable neurological outcome at discharge | 6 | Non-randomized studies | Seriousa | Seriousb | Not serious | Seriousc | None | 505/1109 (45.5%) | 1160/2275 (51.0%) | RR 0.72  (0.45 to 1.13) | 143 fewer per 1,000  (from 280 fewer to 66 more) | ⨁◯◯◯  Very lowa,b,c |
| Favorable neurological outcome at 3 months | 1 | Non-randomized studies | Seriousd | Not seriouse | Not serious | Seriousc | None | 12/91 (13.2%) | 6/29 (20.7%) | RR 0.64  (0.26 to 1.55) | 74 fewer per 1,000  (from 153 fewer to 114 more) | ⨁⨁◯◯  Lowc,d,e |
| Favorable neurological outcome at 6 months | 7 | Non-randomized studies | Seriousf | Seriousg | Not serious | Seriousc | None | 304/1167 (26.0%) | 265/1146 (23.1%) | RR 1.30  (0.55 to 3.08) | 69 more per 1,000  (from 104 fewer to 481 more) | ⨁◯◯◯  Very lowc,f,g |
| Favorable neurological outcome at 12 months | 1 | Non-randomized studies | Not serious | Not seriouse | Not serious | Very seriousc | None | 13/31 (41.9%) | 7/31 (22.6%) | RR 1.86  (0.86 to 4.02) | 194 more per 1,000  (from 32 fewer to 682 more) | ⨁⨁◯◯  Lowc,e |
| Hospital length of stay | 5 | Non-randomized studies | Seriousf | Serioush | Not serious | Not serious | None | 6268 | 121620 | - | MD 6.35 days more  (2.55 more to 10.14 more) | ⨁⨁◯◯  Lowf,h |
| In-hospital mortality | 8 | Non-randomized studies | Seriousf | Seriousi | Not serious | Seriousc | None | 1743/7058 (24.7%) | 12899/123494 (10.4%) | RR 1.33  (0.75 to 2.36) | 34 more per 1,000  (from 26 fewer to 142 more) | ⨁◯◯◯  Very lowc,f,i |
| 30-day mortality | 3 | Non-randomized studies | Seriousf | Not serious | Not serious | Seriousc | Nonej | 35/131 (26.7%) | 78/184 (42.4%) | RR 0.67  (0.31 to 1.46) | 140 fewer per 1,000  (from 293 fewer to 195 more) | ⨁⨁◯◯  Lowc,f,j |
| 3-month mortality | 1 | Non-randomized studies | Seriousd | Not seriouse | Not serious | Seriousc | None | 20/35 (57.1%) | 45/69 (65.2%) | RR 0.88  (0.63 to 1.22) | 78 fewer per 1,000  (from 241 fewer to 143 more) | ⨁⨁◯◯  Lowc,d,e |
| 6-month mortality | 8 | Non-randomized studies | Seriousf | Seriousk | Not serious | Not serious | None | 431/982 (43.9%) | 568/930 (61.1%) | RR 0.68  (0.51 to 0.92) | 195 fewer per 1,000  (from 299 fewer to 49 fewer) | ⨁⨁◯◯  Lowf,k |
| 12-month mortality | 2 | Non-randomized studies | Seriousf | Seriousl | Not serious | Seriousc | Nonem | 32/66 (48.5%) | 69/100 (69.0%) | RR 0.69  (0.02 to 24.31) | 214 fewer per 1,000  (from 676 fewer to 1,000 more) | ⨁◯◯◯  Very lowc,f,l,m |
| 24-month mortality | 1 | Non-randomized studies | Seriousd | Not seriouse | Not serious | Seriousc | None | 21/35 (60.0%) | 48/69 (69.6%) | RR 0.86  (0.63 to 1.18) | 97 fewer per 1,000  (from 257 fewer to 125 more) | ⨁⨁◯◯  Lowc,d,e |
